# Supplementary material for: Genome-Wide Identification and Expression Analyses of Aquaporin Gene Family during Development and Abiotic Stress in Banana
Source: MDPI journal article supplement (doi:10.3390/ijms160819728), 2015-08-20
Supplement: s1 [file s1]

# Supplementary Information

|           |                                           |     |           |                                              |     |
|-----------|-------------------------------------------|-----|-----------|----------------------------------------------|-----|
| MaPIP1-3  | .....MIFALVY..CTAGISGGHINFA               | 20  | MaPIP1-3  | ITCTGTNPARSLGPAIYINKDHWDDHWIFWVGFFIGAAI      | 172 |
| MaPIP1-2  | .....MIFALVY..CTAGISGGHINFA               | 20  | MaPIP1-2  | ITCTGTNPARSLGPAIYINKKHAWDDHWIFWVGFFIGAAI     | 172 |
| MaPIP1-9  | .....MIFILVY..CTAGISGGHINFA               | 20  | MaPIP1-9  | ITCTGTNPARSLGPAIYVYDKSHAWDDHWIFWVGFFIGAAI    | 172 |
| MaPIP1-4  | .....MIFALVY..CTAGISGGHINFA               | 20  | MaPIP1-4  | ITCTGTNPARSLGPAIYINKDHWDDHWIFWVGFFIGAAI      | 172 |
| MaPIP1-7  | .....MIFALVY..CTAGISGGHINFA               | 20  | MaPIP1-7  | ITCTGTNPARSFGPAIYINKDHWDDHWIFWVGFFIGAAI      | 172 |
| MaPIP1-1  | .....MIFALVY..CTAGISGGHINFA               | 20  | MaPIP1-1  | ITCTGTNPARSLGPAIYINKDHWDDHWIFWVGFFIGAAI      | 172 |
| MaPIP1-8  | .....MIFALVY..CTAGISGGHINFA               | 20  | MaPIP1-8  | ITCTGTNPARSLGPAIYINKHAWDDHWIFWVGFFIGAAI      | 172 |
| MaPIP1-6  | STRKSTVGIQGIAWAFGGMIFALVY..CTAGISGGHINFA  | 44  | MaPIP1-6  | ITCTGTNPARSLGPAIYINKGHWDDHWIFWVGFFIGAAI      | 196 |
| MaPIP1-5  | DTKSTVGIQGIAWAFGGMIFALVY..CTAGISGGHINFA   | 44  | MaPIP1-5  | ITCTGTNPARSLGPAIYINKDHWDDHWIFWVGFFIGAAI      | 196 |
| MaPIP2-6  | ADQCSGVGLIGIAWAFGGMIFILVY..CTAGISGGHINFA  | 104 | MaPIP2-6  | ITCTGTNPARSLGPAIYINQDKAWDDHWIFWVGFFIGALA     | 256 |
| MaPIP2-9  | .....MIFILVY..CTAGISGGHINFA               | 20  | MaPIP2-9  | ITCTGTNPARSFGPAIYINKDHWDDHWIFWVGFFIGAAI      | 172 |
| MaPIP2-7  | ADQCSGVGLIGIAWAFGGMIFILVY..CTAGISGGHINFA  | 103 | MaPIP2-7  | ITCTGTNPARSLGPAIYINQDKRFDHWIFWVGFFIGALA      | 255 |
| MaPIP2-5  | .....MIFILVY..CTAGISGGHINFA               | 20  | MaPIP2-5  | ITCTGTNPARSFGPAIYINKDHWDDHWIFWVGFFIGAAI      | 172 |
| MaPIP2-10 | .....MIFILVY..CTAGISGGHINFA               | 20  | MaPIP2-10 | ITCTGTNPARSLGPAIYINQDKRFDHWIFWVGFFIGALA      | 172 |
| MaPIP2-4  | .....MIFILVY..CTAGISGGHINFA               | 20  | MaPIP2-4  | ITCTGTNPARSLGPAIYINQDKAWDDHWIFWVGFFIGAAI     | 172 |
| MaPIP2-13 | .....MIFILVY..CTAGISGGHINFA               | 20  | MaPIP2-13 | ITCTGTNPARSFGPAIYINRHKRFDHWIFWVGFFIGALA      | 172 |
| MaPIP2-11 | .....MIFILVY..CTAGISGGHINFA               | 20  | MaPIP2-11 | ITCTGTNPARSFGPAIYINQKRFHDHWIFWVGFFIGALA      | 172 |
| MaPIP2-3  | .....MIFILVY..CTAGISGGHINFA               | 20  | MaPIP2-3  | ITCTGTNPARSFGPAIYINKDHWDDHWIFWVGFFIGAAI      | 172 |
| MaTIP1-1  | DGAATPAGLIAAALAHGFALFVAVS..VGNISGGHINFA   | 87  | MaTIP1-1  | FSGASINPARSFGPAIVS...WSWTHQWVWVVGFLIGGGL     | 228 |
| MaTIP1-4  | DGSTTPAGLVASLAAHGFALFVAVS..VGNISGGHINFA   | 87  | MaTIP1-4  | FDGASINPARSFGPAIVS...WTWNNHWVWVVGFLIGGGL     | 229 |
| MaTIP1-6  | GAATTPAGLIAAALAHGFALFVAVS..VGNISGGHINFA   | 87  | MaTIP1-6  | FDGASINPARSFGPAIVS...WSWDDHWVWVVGFLIGGGL     | 228 |
| MaTIP4-1  | GEDRIMVVVAFAAQAAMLVAMITA..VGLDVSAGHINFA   | 85  | MaTIP4-1  | FSGASINPARSFGPAIVS...WDWNNHWVWVVGFLIGGGL     | 228 |
| MaTIP3-2  | D.TSTAGGLVVVAIAHALALFVAVS..VSLNISGGHINFA  | 86  | MaTIP3-2  | FDGAAINPARAFGPAIVG...WRWKSHWVWVVGFLIGGGL     | 228 |
| MaTIP5-1  | DVTSDASSLVATALAQGFALFAAVY..IAADISGGHINFA  | 89  | MaTIP5-1  | ITGGSINPARSFGPAIVS...GNFKNHVWVWVVGFLIGGGL    | 240 |
| MaTIP3-1  | D.TSTAGGLVVVAIAHALALFVAVS..IAFNISGGHINFA  | 86  | MaTIP3-1  | FDGAAINPARAFGPAIVG...WRWKNHWVWVVGFFIGAAI     | 228 |
| MaTIP1-5  | GGAAFTPTGLIMAALAHGFALFVAVS..VGNISGGHINFA  | 87  | MaTIP1-5  | FDGASINPARSFGPAIVS...WSWTHQWVWVVGFLIGGGL     | 229 |
| MaTIP2-1  | GAALDPAGLVAAALAHGLALFVGVS..MAANISGGHINFA  | 85  | MaTIP2-1  | FSGGSINPARSFGPAIVS...GDFAGNHWVWVVGFLIGGGL    | 227 |
| MaTIP2-4  | SAALDPAGLVAAIVCHGFALFVAVS..VGFNISGGHINFA  | 85  | MaTIP2-4  | FSGGSINPARSFGPAIVS...GDFSDLVWVWVVGFLIGGGL    | 226 |
| MaTIP4-2  | GQDSIMGLTAV.AVAQAMLVAVMVA..VGLDVSAGHINFA  | 84  | MaTIP4-2  | FSGASINPARSFGPAIVS...WDWNNHWVWVVGFFIGGGL     | 226 |
| MaTIP4-3  | G.DSIMGLTAV.AVAHALVVAVMIS..AGLHISGGHINFA  | 83  | MaTIP4-3  | FSGASINPARSFGPAIVS...WNWTDHWVWVVGFLAGGGL     | 225 |
| MaTIP2-2  | SAALDPAGLVAAIVCHGFALFVAVS..VGNISGGHINFA   | 85  | MaTIP2-2  | FSGGSINPARSFGPAIVS...GNFSDLVWVWVVGFLIGGGL    | 226 |
| MaTIP1-2  | DGSTTPAGLVAAALAHGFALFVAVS..VGNISGGHINFA   | 87  | MaTIP1-2  | FDGASINPARSFGPAIVS...WTWNNHWVWVVGFLIGGGL     | 229 |
| MaTIP2-5  | GAALDAAGLVAAALCHGFALFVAVS..IAANISGGHINFA  | 85  | MaTIP2-5  | FSGGSINPARSFGPAIVS...GDFADLVWVWVVGFLIGGGL    | 224 |
| MaTIP1-3  | DGAATPEGLIAAALAHGFALFVAVS..VGNISGGHINFA   | 87  | MaTIP1-3  | FDGASINPARSFGPAIVS...WSWTHQWVWVVGFLIGGGL     | 228 |
| MaTIP2-3  | GAALDPAGLVAAALAHGLALFVGVS..MAANISGGHINFA  | 85  | MaTIP2-3  | FSGGSINPARSFGPAIVS...GDFSGNHWVWVVGFLIGGGL    | 227 |
| MaNIP1-1  | MITFFG....ICVWGLAVVMVY..SVGHISGAHINFA     | 98  | MaNIP1-1  | ISGASINPARTLGPAIVAN...RWEGFWVWVVGFCIGTVV     | 238 |
| MaNIP1-2  | IVIFFG....ICLAWGLVVMVY..SLGHVSGAHINFA     | 116 | MaNIP1-2  | ISGASINPARTLGPAIVAN...RWEGFWVWVVGFCIGTVV     | 256 |
| MaNIP2-1  | VVSQLG....QSVAGGLIVTVMY..AVGHISGAHINFA    | 113 | MaNIP2-1  | ISGGSINPARTLGPAIVAS...KFDLSLVWVWVVGFLIGGGL   | 252 |
| MaNIP2-2  | LVSQLG....ASVAGGLIVTVMY..AVGHISGAHINFA    | 107 | MaNIP2-2  | ISGGSINPARTLGPAIVAS...NYDSLWVWVVGFLIGGGL     | 246 |
| MaNIP2-3  | AVSQLG....ASVAGGLIVTVMY..AVGHISGAHINFA    | 107 | MaNIP2-3  | ISGGSINPARTLGPAIVAS...NYDALWVWVVGFLIGGGL     | 246 |
| MaNIP2-5  | VVSQLG....ASVAGGLIVTVMY..AVGHISGAHINFA    | 107 | MaNIP2-5  | ISGGSINPARTLGPAIVAS...KYDALWVWVVGFLIGGGL     | 245 |
| MaNIP3-2  | AETLIG....NAACAGLAVMIVIL..STGHISGAHINFA   | 152 | MaNIP3-2  | SSGGSINPARTLGPAIVAS...NYERINWVWVVGFLIGGGL    | 291 |
| MaNIP2-4  | VVSQLG....ASVAGGLIVTVMY..AVGHISGAHINFA    | 137 | MaNIP2-4  | VSGGSINPARTLGPAIVAS...NYQSLWVWVVGFLIGGGL     | 276 |
| MaNIP4-1  | .....MVY..SVGHISGAHINFA                   | 16  | MaNIP4-1  | ISGASINPARTLGPAIVM...NYKAINWVWVVGFLIGGGL     | 156 |
| MaSIP1-1  | ALQIQGVAFSLFVITLILAFVVEGLITAAIGGASINFT    | 73  | MaSIP1-1  | YTGPAINPARAFGPAIVNNRHNTEQFVWVWVVGFLIGGGL     | 219 |
| MaSIP2-1  | TGMDPISVLLKGYLIV.YLYYFSQ..LRKVINGGTINBL   | 94  | MaSIP2-1  | ITGGMVNFASAFGPAIVYQGHKLTREHLCVWVWVVGFLIGGGL  | 234 |
| MaSIP2-2  | LGHRRFGGEALKMALVVG.YMFLFAW..LGHVIRGGAYNBL | 70  | MaSIP2-2  | ITGGINNFASAFGPAIVYARGDHTITDQLIVWVWVVGFLIGGGL | 212 |

**Figure S1.** Alignment of amino acid sequences of MaAQPs. The two conserved NPA motifs are shown in blue box. Amino acids with high identities were shown in black background.

|           |                                          |     |
|-----------|------------------------------------------|-----|
| SlPIP1-1  | MAENKEEDVNLGANKFREPCPLGTSAQTDKDYKEPPAPL  | 40  |
| MaPIP1-3  | .....                                    | 0   |
| MaPIP1-2  | .....                                    | 0   |
| MaPIP1-9  | .....                                    | 0   |
| MaPIP1-4  | .....                                    | 0   |
| MaPIP1-7  | .....                                    | 0   |
| MaPIP1-1  | .....                                    | 0   |
| MaPIP1-8  | .....                                    | 0   |
| MaPIP1-6  | .....                                    | 0   |
| MaPIP1-5  | .....                                    | 0   |
| MaPIP2-6  | .....MSKEVSVEVEQPPAKDYSDFPPAPL           | 25  |
| MaPIP2-9  | .....                                    | 0   |
| MaPIP2-7  | .....MSKEVS.EAEQAPAKDYRDFPPAPL           | 24  |
| MaPIP2-5  | .....                                    | 0   |
| MaPIP2-10 | .....                                    | 0   |
| MaPIP2-4  | .....                                    | 0   |
| MaPIP2-13 | .....                                    | 0   |
| MaPIP2-11 | .....                                    | 0   |
| MaPIP2-3  | .....                                    | 0   |
| Consensus |                                          |     |
| SlPIP1-1  | YEPGELSSWSFYRAGIAEFMATFLFLYITILTVMG..LKR | 78  |
| MaPIP1-3  | .....                                    | 0   |
| MaPIP1-2  | .....                                    | 0   |
| MaPIP1-9  | .....                                    | 0   |
| MaPIP1-4  | .....                                    | 0   |
| MaPIP1-7  | .....                                    | 0   |
| MaPIP1-1  | .....                                    | 0   |
| MaPIP1-8  | .....                                    | 0   |
| MaPIP1-6  | .....MG..VVK                             | 5   |
| MaPIP1-5  | .....MG..VVK                             | 5   |
| MaPIP2-6  | LDFGEVRLWSFYRALIAEFVATLLFLYVSIATVIGHKEQN | 65  |
| MaPIP2-9  | .....                                    | 0   |
| MaPIP2-7  | LDFGELRLWSFYRALIAEFVATLLFLYVTIATVIGHKEQN | 64  |
| MaPIP2-5  | .....                                    | 0   |
| MaPIP2-10 | .....                                    | 0   |
| MaPIP2-4  | .....                                    | 0   |
| MaPIP2-13 | .....                                    | 0   |
| MaPIP2-11 | .....                                    | 0   |
| MaPIP2-3  | .....                                    | 0   |
| H2        |                                          |     |
| SlPIP1-1  | SDSLCSSVGIQGVAWAFGGMIEFLVYCTAGISGGHINPAV | 118 |
| MaPIP1-3  | .....MIEFLVYCTAGISGGHINPAV               | 21  |
| MaPIP1-2  | .....MIEFLVYCTAGISGGHINPAV               | 21  |
| MaPIP1-9  | .....MIEFLVYCTAGISGGHINPAV               | 21  |
| MaPIP1-4  | .....MIEFLVYCTAGISGGHINPAV               | 21  |
| MaPIP1-7  | .....MIEFLVYCTAGISGGHINPAV               | 21  |
| MaPIP1-1  | .....MIEFLVYCTAGISGGHINPAV               | 21  |
| MaPIP1-8  | .....MIEFLVYCTAGISGGHINPAV               | 21  |
| MaPIP1-6  | SSTKCSVGIQGIAWAFGGMIEFLVYCTAGISGGHINPAV  | 45  |
| MaPIP1-5  | SDTKCSVGIQGIAWAFGGMIEFLVYCTAGISGGHINPAV  | 45  |
| MaPIP2-6  | AADQCSGVGLLGIAWAFGGMIEFLVYCTAGISGGHINPAV | 105 |
| MaPIP2-9  | .....MIEFLVYCTAGISGGHINPAV               | 21  |
| MaPIP2-7  | AADQCSGVGILGIAWAFGGMIEFLVYCTAGISGGHINPAV | 104 |
| MaPIP2-5  | .....MIEFLVYCTAGISGGHINPAV               | 21  |
| MaPIP2-10 | .....MIEFLVYCTAGISGGHINPAV               | 21  |
| MaPIP2-4  | .....MIEFLVYCTAGISGGHINPAV               | 21  |
| MaPIP2-13 | .....MIEFLVYCTAGISGGHINPAV               | 21  |
| MaPIP2-11 | .....MIEFLVYCTAGISGGHINPAV               | 21  |
| MaPIP2-3  | .....MIEFLVYCTAGISGGHINPAV               | 21  |

Figure S2. Cont.

|           |                                            |     |
|-----------|--------------------------------------------|-----|
| SlPIP1-1  | TEGIFLARKLSITRAVFYVMVQCCLGAICGAGVVKGFQKGP  | 158 |
| MaPIP1-3  | TEGIFLARKLSITRAIFYVMVQCCLGAICGAGVVKGFQKGV  | 61  |
| MaPIP1-2  | TEGIFLARKLSITRALFYVMVQCCLGAICGAGVVKGFQKGL  | 61  |
| MaPIP1-9  | TEGIFLARKLSITRALFYVMVQCCLGAICGAGVVKGFQKGL  | 61  |
| MaPIP1-4  | TEGIFLARKLSITRAIFYVMVQCCLGAICGAGVVKGFQKGV  | 61  |
| MaPIP1-7  | TEGIFLARKLSITRALFYVMVQCCLGAICGAGVVKGFQKGL  | 61  |
| MaPIP1-1  | TEGIFLARKLSITRAVFYVMVQCCLGAVCGAGVVKGFQKGV  | 61  |
| MaPIP1-8  | TEGIFLARKLSITRAIFYVMVQCCLGAICGAGVVKGFQKGV  | 61  |
| MaPIP1-6  | TEGIFLARKLSITRALFYVMVQCCLGAICGAGVVKGFQKGL  | 85  |
| MaPIP1-5  | TEGIFLARKLSITRALFYVMVQCCLGAICGAGVVKGFQKGL  | 85  |
| MaPIP2-6  | TEGIFLARKVSIIRAVLYIVVQCCLGGIVGVGIVKGIKMHQ  | 145 |
| MaPIP2-9  | TEGIFLARKVSIVRALLYMIAQCCLGAICGAGVVKGFQKAY  | 61  |
| MaPIP2-7  | TEGIFLARKVSIIRALLYIVAQCCLGAIVGVGIVKGIKMHQ  | 144 |
| MaPIP2-5  | TEGIFLARKVSIIRALLYMIGQCCLGAICGAGVVKGFQKAF  | 61  |
| MaPIP2-10 | TEGIFLARKVSIIRALLYMVAQCCLGAIVGVGIVKGIKMHQ  | 61  |
| MaPIP2-4  | TEGIFLARKVSIVRALLYMVAQCCLGAICGAGVVKGFQKAY  | 61  |
| MaPIP2-13 | TEGIFLARKVSIIRAVFYVMVQCCLGAICGAGVVKGIKMHQ  | 61  |
| MaPIP2-11 | TEGIFLARKVSIIRAVFYVMVQCCLGAICGAGVVKGIKMHQ  | 61  |
| MaPIP2-3  | TEGIFLARKVSIIRAVFYVMVQCCLGAICGAGVVKGFQKAY  | 61  |
|           |                                            |     |
| SlPIP1-1  | YQRIGGGANVVAQGYTKGDGLGAEIIGTFVLVYTVFSATD   | 198 |
| MaPIP1-3  | YENNGGGANVVAAGYSKGDGLGAEIVGTIFILVYTVFSATD  | 101 |
| MaPIP1-2  | YESNGGGANVVAQGYTKGDGLGAEIVGTIFILVYTVFSATD  | 101 |
| MaPIP1-9  | YENNGGGANVVAQGYTKGGGLGAEIVGTIFILVYTVFSATD  | 101 |
| MaPIP1-4  | YQSNNGGGANVVAAGYSKGDGLGAEIVGTIFILVYTVFSATD | 101 |
| MaPIP1-7  | YQSNNGGGANVVAAGYTKGDGLGAEIVGTIFILVYTVFSATD | 101 |
| MaPIP1-1  | YESNGGGANVVAAGYSKGDGLGAEIVGTIFILVYTVFSATD  | 101 |
| MaPIP1-8  | YESNGGGANVVAAGYTKGDGLGAEIVGTIFILVYTVFSATD  | 101 |
| MaPIP1-6  | YENNGGGANVVAQGYTKGDGLGAEIVGTIFILVYTVFSATD  | 125 |
| MaPIP1-5  | YESNGGGANVVAAGYTKGDGLGAEIVGTIFILVYTVFSATD  | 125 |
| MaPIP2-6  | YNSIGGGANVVAIGYSKGTALGAEIIGTFVLVYTVFSATD   | 185 |
| MaPIP2-9  | YVRYGGGANELSDGYSKGTGLAEIIGTFVLVYTVFSATD    | 101 |
| MaPIP2-7  | YNSIGGGANVVAAGYSKGTALGAEIIGTFVLVYTVFSATD   | 184 |
| MaPIP2-5  | FVRYGGGANELSDGYSKGTGLAEIIGTFVLVYTVFSATD    | 101 |
| MaPIP2-10 | YNSIGGGANVVAAGYSKGTALGAEIIGTFVLVYTVFSATD   | 101 |
| MaPIP2-4  | FVRYGGGANELSDGYSKGTGLAEIIGTFVLVYTVFSATD    | 101 |
| MaPIP2-13 | FNREGGGANVVAQGYTKGTALGAEIIGTFILVYTVFSATD   | 101 |
| MaPIP2-11 | FNREGGGANVVAAGYSKGTALGAEIIGTFVLVYTVFSATD   | 101 |
| MaPIP2-3  | FVRYGGGANELSDGYSKGTGLAEIIGTFVLVYTVFSATD    | 101 |
|           |                                            |     |
|           | H5 LE1                                     |     |
| SlPIP1-1  | PKRNARDSHVEFLAPLPIGFAVFLVHLATIFITGTGINPA   | 238 |
| MaPIP1-3  | PKRNARDSHVEFLAPLPIGFAVFLVHLATIFITGTGINPA   | 141 |
| MaPIP1-2  | PKRNARDSHVEFLAPLPIGFAVFLVHLATIFITGTGINPA   | 141 |
| MaPIP1-9  | PKRSARDSHVEFLAPLPIGFAVFLVHLATIFITGTGINPA   | 141 |
| MaPIP1-4  | PKRNARDSHVEFLAPLPIGFAVFLVHLATIFITGTGINPA   | 141 |
| MaPIP1-7  | PKRNARDSHVEFLAPLPIGFAVFLVHLATIFITGTGINPA   | 141 |
| MaPIP1-1  | PKRNARDSHVEFLAPLPIGFAVFLVHLATIFITGTGINPA   | 141 |
| MaPIP1-8  | PKRSARDSHVEFLAPLPIGFAVFLVHLATIFITGTGINPA   | 141 |
| MaPIP1-6  | PKRSARDSHVEFLAPLPIGFAVFLVHLATIFITGTGINPA   | 165 |
| MaPIP1-5  | PKRNARDSHVEFLAPLPIGFAVFLVHLATIFITGTGINPA   | 165 |
| MaPIP2-6  | PKRSARDSHVEFLAPLPIGFAVFLVHLATIFITGTGINPA   | 225 |
| MaPIP2-9  | PKRNARDSHVEFLAPLPIGFAVFLVHLATIFITGTGINPA   | 141 |
| MaPIP2-7  | PKRSARDSHVEFLAPLPIGFAVFLVHLATIFITGTGINPA   | 224 |
| MaPIP2-5  | PKRSARDSHVEFLAPLPIGFAVFLVHLATIFITGTGINPA   | 141 |
| MaPIP2-10 | PKRSARDSHVEFLAPLPIGFAVFLVHLATIFITGTGINPA   | 141 |
| MaPIP2-4  | PKRNARDSHVEFLAPLPIGFAVFLVHLATIFITGTGINPA   | 141 |
| MaPIP2-13 | PKRSARDSHVEFLAPLPIGFAVFLVHLATIFITGTGINPA   | 141 |
| MaPIP2-11 | PKRSARDSHVEFLAPLPIGFAVFLVHLATIFITGTGINPA   | 141 |
| MaPIP2-3  | PKRSARDSHVEFLAPLPIGFAVFLVHLATIFITGTGINPA   | 141 |

Figure S2. Cont.



|           |                                              |     |
|-----------|----------------------------------------------|-----|
|           | LE2                                          |     |
| SlPIP1-1  | R3NGEAIIFNQDQAWDDHWIFWFGNFI GAALAAIYECIII    | 278 |
| MaPIP1-3  | R3LGEAI IYNKDHPWDDHWIFWVGPF IGAALAAFYECIVI   | 181 |
| MaPIP1-2  | R3LGEAI IYNKKHAWDDHWIFWVGPF IGAALAAIYECIVI   | 181 |
| MaPIP1-9  | R3LGEAI VYDKSHAWNDDHWIFWVGPF IGAALAAAMYQCIVI | 181 |
| MaPIP1-4  | R3LGEAI IYNKDHPWDDHWIFWVGPF IGAALAAIYECVVI   | 181 |
| MaPIP1-7  | R3FGEAI IYNKDHPWDDHWIFWVGPF IGAALAAIYECVVI   | 181 |
| MaPIP1-1  | R3LGEAI IYNKDHPWDDHWIFWVGPF IGAALAAIYECVVI   | 181 |
| MaPIP1-8  | R3LGEAI IYNKEHAWNDDHWIFWVGPF IGAALAAIYECVVI  | 181 |
| MaPIP1-6  | R3LGEAI IYNKGHAWDDHWIFWVGPF IGAALAAIYECVVI   | 205 |
| MaPIP1-5  | R3LGEAI IYNKDHPWDDHWIFWVGPF IGAALAAAMYECVVI  | 205 |
| MaPIP2-6  | R3LGEAI IYNQDKAWDDHWIFWVGPF IGAALAAAYECYIL   | 265 |
| MaPIP2-9  | R3FGEAI IYNKDKAWDDQWIFWVGPF IGAALAAAYECYIL   | 181 |
| MaPIP2-7  | R3LGEAI IYNQDKAWDDHWIFWVGPF IGAALAAAYECYIL   | 264 |
| MaPIP2-5  | R3FGEAI IYNKDKAWDDQWIFWVGPF IGAALAAAYECYIL   | 181 |
| MaPIP2-10 | R3LGEAI IYNQDKAWDDHWIFWVGPF IGAALAAAYECYIL   | 181 |
| MaPIP2-4  | R3LGEAI IYNQDKAWDDQWIFWVGPF IGAALAAAYECYVL   | 181 |
| MaPIP2-13 | R3FGEAI IYNRHKEFWDDHWIFWVGPF IGAALAEVYECYVL  | 181 |
| MaPIP2-11 | R3FGEAI IYNQHKFWDDHWIFWVGPF IGAALAAVYECYVL   | 181 |
| MaPIP2-3  | R3FGEAI IYNKDKAWDDQWIFWVGPF IGAALAAAYECYVL   | 181 |
| SlPIP1-1  | RAIPFKSRA.....                               | 287 |
| MaPIP1-3  | RAIPFKSRS.....                               | 190 |
| MaPIP1-2  | RAIPFKSRP.....                               | 190 |
| MaPIP1-9  | RAIPFKSRP.....                               | 190 |
| MaPIP1-4  | RAIPFKSRS.....                               | 190 |
| MaPIP1-7  | RAIPFKNRT.....                               | 190 |
| MaPIP1-1  | RAIPFKNRS.....                               | 190 |
| MaPIP1-8  | RAIPFKSKR.....                               | 190 |
| MaPIP1-6  | RAIPFKSRS.....                               | 214 |
| MaPIP1-5  | RAIPFKSRP.....                               | 214 |
| MaPIP2-6  | RAAAIKALGSFRSNPSN                            | 282 |
| MaPIP2-9  | RASGAKALGSSSSI...                            | 195 |
| MaPIP2-7  | RAAAIKALGSFRSNPTN                            | 281 |
| MaPIP2-5  | RAGAVKALGSFRSNA..                            | 196 |
| MaPIP2-10 | RAAAIKALGSFRSNPTN                            | 198 |
| MaPIP2-4  | RASGAKAMGSFGSNA..                            | 196 |
| MaPIP2-13 | RAANVKTLGSFRSSRSN                            | 198 |
| MaPIP2-11 | RAAAIKALGSFRSSRSN                            | 198 |
| MaPIP2-3  | RASGVKALGSFRSSA..                            | 196 |

**Figure S2.** Alignment of amino acid sequences of MaPIPs. Residues comprising the ar/R filter are marked in red box and labeled as H2, H5, LE1 and LE2. Amino acids with high identities were shown in black background.

|           |                                             |    |
|-----------|---------------------------------------------|----|
| SlTIP1-1  | ..MFINQITIGSHEELRHPGALKAAALAEFISTLIFVFEAGQ  | 38 |
| MaTIP1-1  | ..MPFSQIAIGRPFEATHPSALKAAALAEFICTLIFVFEAGQ  | 38 |
| MaTIP1-4  | ..MPILRITIGTPFEARHPTALKAAALAEFISVLIFVFEAGQ  | 38 |
| MaTIP1-6  | ..MPFPIRIAVGTQEEATHPGTLKAAALAEFISTLIFVFEAGQ | 38 |
| MaTIP4-1  | ...MRKITLGSRNEAVEPFDVRSVFTBLLLTFLFVFEAGV    | 36 |
| MaTIP3-1  | ..MPRRFAFGRAEDAVHFDTMRAALSBEFIATLIFVEAAE    | 38 |
| MaTIP5-1  | MSSKLLCFFTSGVNFWLSAASLSYLAEFISTFFVFEAAV     | 40 |
| MaTIP3-1  | ..MPRRFAFGRTDDAVHFDTMRAALSBEFIATLIFVEAAE    | 38 |
| MaTIP1-5  | ..MPISRIAIGTTEEATHPSALKAAALAEFICTFIFVFEAGQ  | 38 |
| MaTIP2-1  | ...MVKLALGSLGDSFSVSVSLKSYLAEFIATLIFVFEAGV   | 36 |
| MaTIP2-4  | ...MAGIAFGRFDDSFVSGSLKAYLAEFISTLIFVFEAGV    | 36 |
| MaTIP4-2  | ...MARIKLGSRKEMTDFEFARSVLTBLLLTFLFVFEAGV    | 36 |
| MaTIP4-3  | ...MAKIALGNHHEAAEPGCIRAVLAEVVLTFLFVFEAGV    | 36 |
| MaTIP2-2  | ...MAGIAFGQFDDSFVSGTLKAYLAEFISTLIFVFEAGV    | 36 |
| MaTIP1-2  | ..MPISGIAIGAPGEASHFDTIKASLAEFISTLIFVEAGE    | 38 |
| MaTIP2-5  | ...MACIAFGRCDDSFSATSLKAYLAEFISTLIFVFEAGV    | 36 |
| MaTIP1-3  | ..MPITQIAIGTTAEATHPTALKAAALAEFICTFIFVFEAGQ  | 38 |
| MaTIP2-3  | ...MVKITLGLGDSFSAGSLKAYLAEFIATLIFVFEAGV     | 36 |
| Consensus | e fvf                                       |    |
|           | H2                                          |    |
| SlTIP1-1  | GSGMAFNKLT.DGVATPAGLISASIAHAFGLFVAVSVGAN    | 77 |
| MaTIP1-1  | GSGMAYNKLTSDGAATPAGLIAAALAHGFALFVAVSVGAN    | 78 |
| MaTIP1-4  | GSGMAFNKLTDDGSTTPAGLVSASLAHGFGLYVAVAVGAN    | 78 |
| MaTIP1-6  | GSGMAFSKLTGGAAATTPAGLIAAALAHAFALFVAVSVGAN   | 78 |
| MaTIP4-1  | GAVMTAEFVAGGEDRIMWVVAAPAAACQMLVAMITAVGLD    | 76 |
| MaTIP3-2  | GSVLSLGKLY.KDTSTAGGLVVVAIAHALALSVAVSVSIN    | 77 |
| MaTIP5-1  | GSAISARMLTPDVTSASSIVATALAQGFALFAAVYIAAD     | 80 |
| MaTIP3-1  | GSILSLGKLY.KDTSTAGGLVVVAIAHALALAVAVAIAFN    | 77 |
| MaTIP1-5  | GSGMAYSKMTSGGAATFTGLIMAALAHAFALFVAVSVGAN    | 78 |
| MaTIP2-1  | GSAIAYGKLTGGAAALDPAGLVAVALAHGLALFVGVSMAN    | 76 |
| MaTIP2-4  | GSAIAYNKLTSSAALDPAGLVAIAVCHGHALFVAVSVGFN    | 76 |
| MaTIP4-2  | AASMTAGKMAGGQDSIMGLTAV.AVAQCMVAVMVAVGLD     | 75 |
| MaTIP4-3  | GAAMAAEKMVGG.DSIMGLTAV.AVAHALVVAVMISAGLH    | 74 |
| MaTIP2-2  | GSAIAYNKLTSSAALDPAGLVAIAVCHGLALFVAVSVGAN    | 76 |
| MaTIP1-2  | GSGMAFNKLTNDGSTTPAGLVAASLAHGFALFVAVSVGAN    | 78 |
| MaTIP2-5  | GSAIAYGKLTSGAALDAAGLVAVALCHGLALFVAVAIAN     | 76 |
| MaTIP1-3  | GSGMAYNKLTSDGAATPEGLIAAALAHGFALFVAVSVGAN    | 78 |
| MaTIP2-3  | GSAIAYGKLTSGAALDPAGLVAVALAHGLALFVGVSMAN     | 76 |
| Consensus |                                             |    |

Figure S3. Cont.



|           |                                             |     |
|-----------|---------------------------------------------|-----|
| SlTIP1-1  | ISGGHVNPAVTFGAFVGGNITLFRGILYIIPQLIGSTAAC    | 117 |
| MaTIP1-1  | ISGGHVNPAVTFGAFVGGNITLLRGILYWIPQLIGSTVAC    | 118 |
| MaTIP1-4  | ISGGHVNPAVTFGAFVGGNITLLRGILYWIPQLIGSVVAC    | 118 |
| MaTIP1-6  | ISGGHVNPAVTFGVFIGGNITLLRSIYWIPQLIGSTVAC     | 118 |
| MaTIP4-1  | VSAGHLNPAVTIGFAAGGYVTVVRVLYVIAQLIGSSMAC     | 116 |
| MaTIP3-2  | ISGGHVNPAVTLGALVGGRIISLILAVFYWVPAQLIGAVVAA  | 117 |
| MaTIP5-1  | ISGGHVNPAVTFGLAVAGHIGVPTAIFYWISQLIGGSILAC   | 120 |
| MaTIP3-1  | ISGGHVNPAVTLGALVGGRIISLVRVIFYWVPAQLIGAVVAA  | 117 |
| MaTIP1-5  | ISGGHVNPAVTFGAFVGGNITLLRGVLYWVPAQLIGSTAAC   | 118 |
| MaTIP2-1  | ISGGHLNPAVTFGLAVGGHITILTGFIFYWVPAQLIGSTVAC  | 116 |
| MaTIP2-4  | ISGGHVNPAVTFGLALGGQITILTGIIFYWISQLIGAVVGA   | 116 |
| MaTIP4-2  | VSAGHLNPAVTIGFAAGGYVTVFRVLYVIVQLIGSSMAC     | 115 |
| MaTIP4-3  | ISGGHLNPAVTLGLAVGGHVTVVRSLLYVPAQLIGSTLAC    | 114 |
| MaTIP2-2  | ISGGHVNPAVTFGLALGGQITILTGIIFYWVPAQLIGAVVGA  | 116 |
| MaTIP1-2  | ISGGHVNPAVTFGAFVGGNISLIRGILYWIPQLIGSVVAC    | 118 |
| MaTIP2-5  | ISGGHVNPAVTFGLALGGQITILTGLLYWVPAQLIGAVVGA   | 116 |
| MaTIP1-3  | ISGGHVNPAVTFGAFVGGNITLLRGILYWIPQLIGSTVAC    | 118 |
| MaTIP2-3  | ISGGHLNPAVTFGLAVGGHITLLTGVIFYWIPQLIGSTVAC   | 116 |
| Consensus | s gh npavt g g y ql g                       |     |
| SlTIP1-1  | ALLEFATGG.MSTGSFALSAGVSVWNAFVFPIVMTFGLVY    | 156 |
| MaTIP1-1  | LLLRFFSTGG.LETGTFFGLS.GVSAWEALVLEPIVMTFGLVY | 156 |
| MaTIP1-4  | LLLKFFATGG.LETTFPSLSSSVTVWNALVFPIVMTFGLVY   | 157 |
| MaTIP1-6  | LLLRYSTGG.LSTGSFALS.GVSVWEALVLEPIVMTFGLVY   | 156 |
| MaTIP4-1  | LLLKYYAAGLDVLFVHALAAGMDPLQGVIMPVAVTFESMVF   | 156 |
| MaTIP3-2  | LLLRLATGG.MRPLGFGVASGVSEGHAVLLEPIVMTFGLVY   | 156 |
| MaTIP5-1  | LLLRVASAG.QAIPFTTGIGTEMGTGFGGAVVPSAIFILVY   | 159 |
| MaTIP3-1  | LLLRLATGG.MRPVGFVSASGVSDWHAVLLEPIVMTFGLVY   | 156 |
| MaTIP1-5  | LLLHFATGG.LETGTFFGLSSGVGVWEALVLEPAVMTFGLVY  | 157 |
| MaTIP2-1  | LLLKFTVGG.LAVPTHGVAAGMSELEGVVMPIVITFALVY    | 155 |
| MaTIP2-4  | FLLKFFSTG.LDTPFTHGLGAGVGAGEGVVMBIITFALVY    | 154 |
| MaTIP4-2  | LLLQYIAGG.QAVFVHALGVGIGPLQGAIMPVMTFESMVF    | 154 |
| MaTIP4-3  | LLLKYLTTGG.LDTPFVHTLAAGMGAVQGVIMPVMTFESLLE  | 153 |
| MaTIP2-2  | FLVKFATG.LDTPFTHGLGDGVGAGEAVVMBIITFALVY     | 154 |
| MaTIP1-2  | LLKLATGG.LETSAFSLSSDVSVWNAVVFPIVMTFGLVY     | 157 |
| MaTIP2-5  | FLLKFFATG.LDTPFTHSLG.VGAVEGVVMBIITFALVY     | 152 |
| MaTIP1-3  | LLLRFFSTGG.LETGTFFGLT.GVSVWEALVLEPIVMTFGLVY | 156 |
| MaTIP2-3  | LLLKFTVGG.MAVPTHGVAAGMSELEGVVMPIVITFALVY    | 155 |
| Consensus | l e tf                                      |     |

Figure S3. *Cont.*

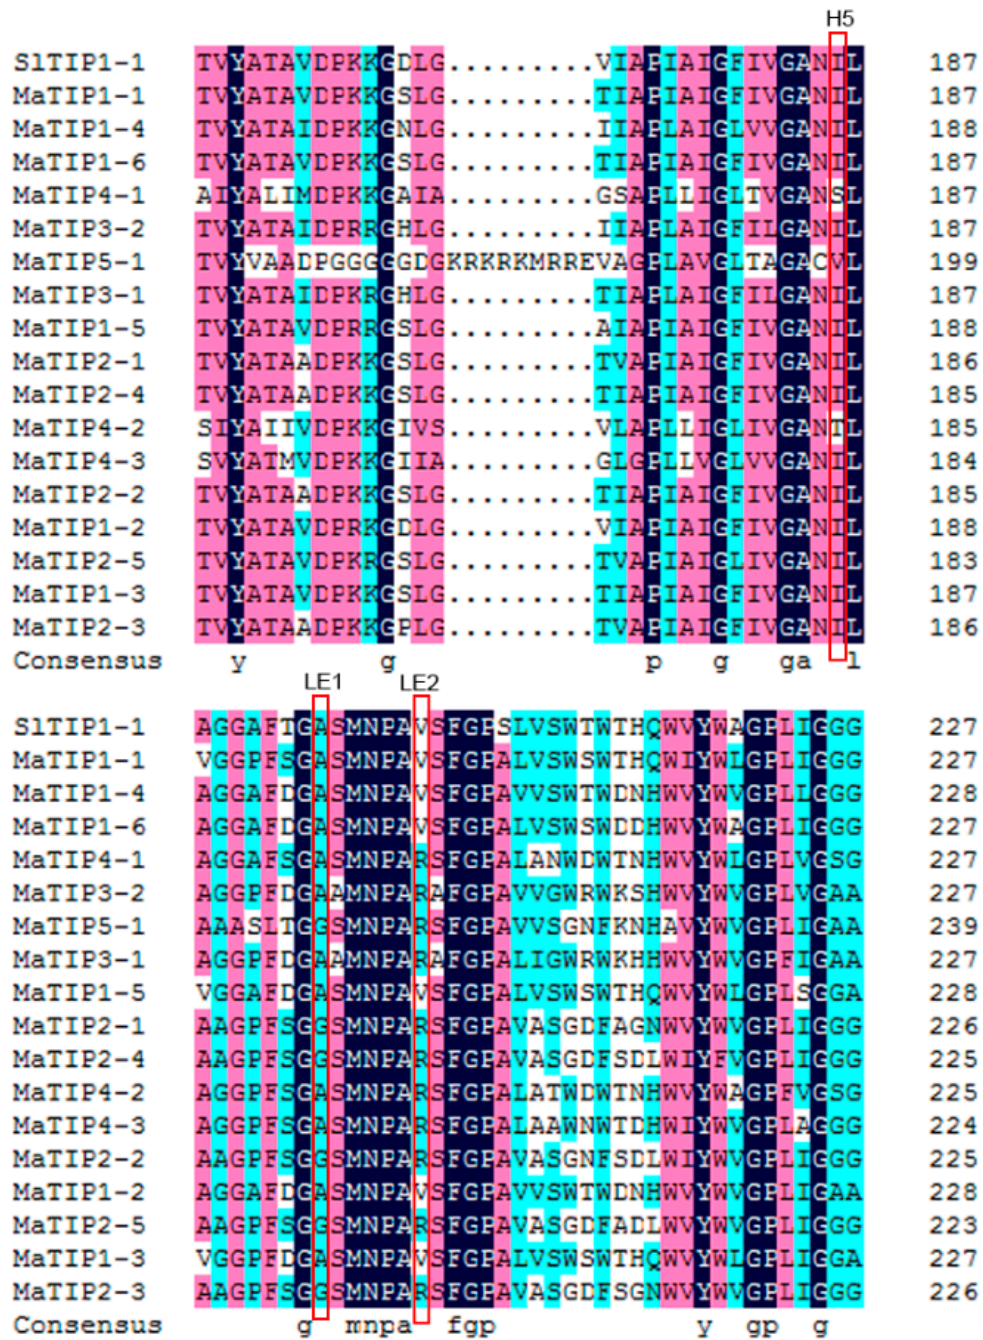

**Figure S3. Cont.**

|           |                                   |     |
|-----------|-----------------------------------|-----|
| SlTIP1-1  | LAGFIYEFIFISH....THEQIPSGDF.....  | 250 |
| MaTIP1-1  | LAGIVYEFFFISH....SHEQLPTTDY.....  | 250 |
| MaTIP1-4  | IAALVYDGVFIGFG...THEQLPTTDY.....  | 252 |
| MaTIP1-6  | LAGLVYEFFFISH....THEQLSSADY.....  | 250 |
| MaTIP4-1  | LAGFAHHHLYVAG....THGVLLPKDDEVGF.. | 254 |
| MaTIP3-2  | LAGLIYEFLVIPDETPTHQPLAPEDY.....   | 254 |
| MaTIP5-1  | IAALVHQYLVFPS....ASSDAYPNSTV..... | 263 |
| MaTIP3-1  | LAGVMYEFLMIPAEAPRTHQPLAPEDY.....  | 254 |
| MaTIP1-5  | LAGLVYEIFFICS....THEQLASADY.....  | 251 |
| MaTIP2-1  | LAGLIYGDIFIGS....YQPVAAQDYP.....  | 249 |
| MaTIP2-4  | LAGLVYTYAYLLH....DHQPLPQ.....     | 245 |
| MaTIP4-2  | LAGFVYDHLVLMR....PRDDLPGDEESITKPL | 254 |
| MaTIP4-3  | LAGLVYEHLFMVS....THVPLPREDEGF.... | 249 |
| MaTIP2-2  | LAGLVYTYAYMCS....DHQPLPQ.....     | 245 |
| MaTIP1-2  | IAALVYDGVFIGQA...THEQLPPSDY.....  | 252 |
| MaTIP2-5  | LAGLVYTYAYMCT....DHTPLPQ.....     | 243 |
| MaTIP1-3  | LAGIVYEIFFISH....SHEQLPTADY.....  | 250 |
| MaTIP2-3  | LAGLIYGDIFIGS....YEAVAAQDYP.....  | 249 |
| Consensus | a                                 |     |

**Figure S3.** Alignment of amino acid sequences of MaTIPs. Residues comprising the ar/R filter are marked in red box and labeled as H2, H5, LE1 and LE2. Amino acids with high identities were shown in black background.



|           |                                            |     |
|-----------|--------------------------------------------|-----|
| SlNIP1-1  | .....                                      | 0   |
| MaNIP1-1  | .....                                      | 0   |
| MaNIP1-2  | .....MSRAG                                 | 5   |
| MaNIP2-1  | .....MASS                                  | 4   |
| MaNIP2-2  | .....MASS                                  | 4   |
| MaNIP2-3  | .....MASH                                  | 4   |
| MaNIP2-5  | .....MASF                                  | 4   |
| MaNIP3-2  | MHQYLIQQILTKNILKPKPLAMPEPETPNVSAPATPGTPG   | 40  |
| MaNIP2-4  | .....MKCLKRSEIFSQPGRTQEDHTLRRSSSWRLEMASQ   | 35  |
| MaNIP4-1  | .....                                      | 0   |
| Consensus |                                            |     |
| SlNIP1-1  | .....MADHQINVNGNINHGVSINIKEDHDLNNHKESSS    | 34  |
| MaNIP1-1  | .....MEEGAAGDGREEGVNPDHG.YASSADKG          | 27  |
| MaNIP1-2  | EACCSDGSEERFVEERSAADRGEERVTLDHAGGGSCSAEA   | 45  |
| MaNIP2-1  | HVRPNNS..NEIHDIDVVTIAQTLTTP.SFFDPPRVHRRRN  | 41  |
| MaNIP2-2  | .TRPNSS..NEIHDIDVVTIAQNSY.....ISPTLLHQKS   | 35  |
| MaNIP2-3  | GTRPTTTACNEIH..DAVTHTS.....ISPSLLHRKS      | 35  |
| MaNIP2-5  | .....NEIHDIDVVTIVQTLAAEDDFVPAARLRRRK       | 35  |
| MaNIP3-2  | APLFNSLRVDSLSYDRKSMFRCNRCPLSWASSPHTCFI     | 80  |
| MaNIP2-4  | .TRPNIS..NEIHDIDVVTIAQSS.....VSPRLLHHES    | 65  |
| MaNIP4-1  | .....                                      | 0   |
| Consensus |                                            |     |
| SlNIP1-1  | TSSFLTVPFIQKVIAEMIGTYFLIFAGCGSVVNVNADK.GM  | 73  |
| MaNIP1-1  | CGLSLSIFFLQKILAEIFGTYFLIFAGCASVTVNLSK.GM   | 66  |
| MaNIP1-2  | CVFTFSFCFFQKIIAEILGTYFMIFAGCGSVAVNLST.GI   | 84  |
| MaNIP2-1  | LKELFPPFLPRKVVSEMIATFLLVFEVTCGAGALNKNNPGV  | 81  |
| MaNIP2-2  | LKEVFPPFLARKVVAETIATFLLVFEATCGSAALSKSNPGL  | 75  |
| MaNIP2-3  | LEELFPPFLAEKVVAETIATFLLVFEVTCGSAALSKSEAGA  | 75  |
| MaNIP2-5  | FQEIFFPPFLLRKVIAEVIATFLLVFEVTCGAGALNKNNPRV | 75  |
| MaNIP3-2  | ELPKPDVSLTRKLGAEFVGTFILIFGATAAPIVNQKYNGA   | 120 |
| MaNIP2-4  | LRELFPFPLARKVVAEMISTFLLVFEVTCGAGALNKNSNGV  | 105 |
| MaNIP4-1  | .....                                      | 0   |
| Consensus |                                            |     |

Figure S4. *Cont.*

|           |                                           |     |  |
|-----------|-------------------------------------------|-----|--|
|           |                                           | H2  |  |
| SlNIP1-1  | ITFPGVAITWGLVVMVMVYSVGHISGAHFNEAVTIAFASV  | 113 |  |
| MaNIP1-1  | ITFPGICVWGLAVMVMVYSVGHISGAHFNEAVTIAFATC   | 106 |  |
| MaNIP1-2  | VTFFPGICLAWGLVVMAMVYSIGHVSGAHFNEAVTIAFATC | 124 |  |
| MaNIP2-1  | VSQLGQSVAGGLIVTVMIYAVGHISGAHMNEAVILAFAVA  | 121 |  |
| MaNIP2-2  | VSQLGASVAGGLIVTVMIYAVGHISGAHMNEAVILAFAVA  | 115 |  |
| MaNIP2-3  | VSQLGASVAGGLIVTVMIYAVGHISGAHMNEAVILAFAVS  | 115 |  |
| MaNIP2-5  | VSQLGASVAGGLIVTVMIYAVGHISGAHMNEAVILAFAVS  | 115 |  |
| MaNIP3-2  | ETLIGNAACAGLAVMIVILSTGHISGAHINESTIAFAML   | 160 |  |
| MaNIP2-4  | VSQLGASVAGGLIVTVMIYAVGHISGAHMNEAVTFAFAVS  | 145 |  |
| MaNIP4-1  | .....MVYSVGHISGAHFNEAVTTTETIL             | 24  |  |
| Consensus | gh sgah np t f                            |     |  |
| SlNIP1-1  | KRFPWKQVEPYVPAQVLGATLASGTLRLIFNGKHDHFAG.  | 152 |  |
| MaNIP1-1  | GRFPWKQVEPYVFAQLLGATLASGTLRLMFGGKHEHFPG.  | 145 |  |
| MaNIP1-2  | GRFPWRQVEPYVSAQVLGSTISIGTLRLLLFGGKHGQFLG. | 163 |  |
| MaNIP2-1  | RHFPWIQVEFYMLAQIAGSTTASYILRELLDF..IHDLG.  | 158 |  |
| MaNIP2-2  | RHFPWIQVEFYMPAQISGAMIASFVLRELLHF..ITDLG.  | 152 |  |
| MaNIP2-3  | RHFPWIQVEFYISAQISGAMVSSFVLRELLHF..ITDLG.  | 152 |  |
| MaNIP2-5  | RHFPWIQVEFYWSAQFSGAMIASFILRELLHF..ITDLG.  | 152 |  |
| MaNIP3-2  | RHFPWAHVEPYILAQVSASICASFALKAVF...HPFLSGG  | 197 |  |
| MaNIP2-4  | RHFPWIQVEFYMCAQISGAMVASFVLRELLHF..ITNLG.  | 182 |  |
| MaNIP4-1  | KQFPLKQLELYMVAQLVGAILASGAVYLLDFPKAEHFG.   | 63  |  |
| Consensus | fp p y aq g                               |     |  |
| SlNIP1-1  | .TLPSGTDQSFVIEFIITEFYLMFVISGVATDNRANGELA  | 191 |  |
| MaNIP1-1  | .TIPAGSDVQSLVLEFIISEFYLMFVISGVATDNRANGELA | 184 |  |
| MaNIP1-2  | .TVEAGSDLQSLVLEFIISKILMFVISGVATDSRANGELA  | 202 |  |
| MaNIP2-1  | TTTFSHTAAKALVAEIVVTFNMMFVTAAVATDTRANGELA  | 198 |  |
| MaNIP2-2  | TTTFSDTAVKALVMEIVVTFCEMFVTSAVATDTRANGELA  | 192 |  |
| MaNIP2-3  | TTTFSDTALKALVMEIVVTFCEMFVTSAVATDSKANGELA  | 192 |  |
| MaNIP2-5  | TTTFSSTFARSLIMEVVVTFSEMFVTSAVATDTRANGELA  | 192 |  |
| MaNIP3-2  | VTVPSSSPQAFFIEFLITENLIFVVTAVATDTRANGELA   | 237 |  |
| MaNIP2-4  | TTTFSDTAAKALVMEIVVTFCEMFVTSAVATDTRANGELA  | 222 |  |
| MaNIP4-1  | .TTEVGSADVQSFVLEIIISFLLMFVISGVATDTRANGELA | 102 |  |
| Consensus | t p e fv vatd a gela                      |     |  |

Figure S4. *Cont.*

|           |                        | H5              | LE1               | LE2             |     |
|-----------|------------------------|-----------------|-------------------|-----------------|-----|
| SlNIP1-1  | GLAVGATILLNVMTGFI      | ISG             | SMNPP             | RSIGPAIVSSHYKG  | 231 |
| MaNIP1-1  | GLAVGATILLNVLIAGFI     | ISG             | SMNPP             | RTILGPAIVANRWEG | 224 |
| MaNIP1-2  | GLVVGATVVVNVLFAGFI     | ISG             | SMNPP             | RSIGPAIIANRWEG  | 242 |
| MaNIP2-1  | GLAVGSAVCITISILAGFI    | ISG             | SMNPP             | RTILGPALASNKFDS | 238 |
| MaNIP2-2  | GLAVGSSVCITISILAGFI    | ISG             | SMNPP             | RTILGPAVASSNYDS | 232 |
| MaNIP2-3  | GLAVGSAVCITISILAGFI    | ISG             | SMNPP             | RTILGPALASRNYDA | 232 |
| MaNIP2-5  | G.PVGSAVCITISILAGFI    | ISG             | SMNPP             | RTILGPAVASRKYDA | 231 |
| MaNIP3-2  | GIPVGATVMLNILVAGFS     | SG              | SMNPP             | RTILGPAAAGNYER  | 277 |
| MaNIP2-4  | GLAVGSSVCITISILAGFI    | ISG             | SMNPP             | RTILGPAVASRNYQS | 262 |
| MaNIP4-1  | GIPVGSTILLNVLVAGFI     | ISG             | SMNPP             | RSIGPAIVMRNYKA  | 142 |
| Consensus | g vg                   | gp sg           | smnp r            | gpa             |     |
|           |                        |                 |                   |                 |     |
| SlNIP1-1  | LWYIVLSFTILGAIAGAWVYNI | IRFTDK          | .....             | FLR             | 261 |
| MaNIP1-1  | FWYIVIGPICGTVVGAWAYNI  | IRFTNK          | .....             | FLR             | 254 |
| MaNIP1-2  | LWYIVIGPICGTVLGAWAYNI  | IRFTDR          | .....             | FLR             | 272 |
| MaNIP2-1  | LWYIFVGFVGTIVAGALAYS   | FIRLDEHSL       | .....             | SQK             | 271 |
| MaNIP2-2  | LWYIFLGFVLGTLGACSY     | SFIRMTE         | TETQP             | .....           | QAT |
| MaNIP2-3  | LWYIFLGFVVGTLGAFSY     | SFIRMTE         | KQP               | .....           | LST |
| MaNIP2-5  | LWYIFVGFVLGTLGTM       | SYR             | FIRMTEKQPPQSLPSMG | SST             | 271 |
| MaNIP3-2  | IWIYIVAFITAGAVTGA      | AVYTAVKLKEEDGEM | .....             | FRQ             | 311 |
| MaNIP2-4  | LWYIFVGFVLGTVSGS       | SFSY            | SFIRMTEKQQ        | .....           | HTT |
| MaNIP4-1  | IWIYVIGFMIGTLAG        | GFTYNI          | VRYTDK            | .....           | FLR |
| Consensus | w y p g g y            |                 |                   |                 |     |
|           |                        |                 |                   |                 |     |
| SlNIP1-1  | EITKSG..SFLKSKNS       | ST              | .....             |                 | 277 |
| MaNIP1-1  | EITKSG..SFLKSFRNN      | ST              | .....             |                 | 271 |
| MaNIP1-2  | EITNIATASFLKRLTRK      | DSA             | .....             |                 | 292 |
| MaNIP2-1  | DSQKSP.SLKMRVQSQD      | MASPTNDAFESGV   | .....             |                 | 301 |
| MaNIP2-2  | AAQKLS.SFKLRLRLQ       | SLEMASPTNNAFDNI | .....             |                 | 293 |
| MaNIP2-3  | TTQKLS.SFKLRLRLQ       | SQDMPSFLADASGRV | .....             |                 | 293 |
| MaNIP2-5  | APKSPSTSLKLRLRLQ       | SQEMASFAHVNP    | .....             |                 | 298 |
| MaNIP3-2  | QLLEDYPRHTRYALQ        | NDSWIVASYFYLCV  | KHIFLLQML         |                 | 351 |
| MaNIP2-4  | AAQKLS.SFKLRLRLQ       | SQEMASFTSNAFENV | .....             |                 | 323 |
| MaNIP4-1  | EITKSS..SFLKSVSRNR     | .....           |                   |                 | 188 |
| Consensus |                        |                 |                   |                 |     |
|           |                        |                 |                   |                 |     |
| SlNIP1-1  | .....                  |                 |                   |                 | 277 |
| MaNIP1-1  | .....                  |                 |                   |                 | 271 |
| MaNIP1-2  | .....                  |                 |                   |                 | 292 |
| MaNIP2-1  | .....                  |                 |                   |                 | 301 |
| MaNIP2-2  | .....                  |                 |                   |                 | 293 |
| MaNIP2-3  | .....                  |                 |                   |                 | 293 |
| MaNIP2-5  | .....                  |                 |                   |                 | 298 |
| MaNIP3-2  | NCEYCKL                |                 |                   |                 | 358 |
| MaNIP2-4  | .....                  |                 |                   |                 | 323 |
| MaNIP4-1  | .....                  |                 |                   |                 | 188 |
| Consensus |                        |                 |                   |                 |     |

**Figure S4.** Alignment of amino acid sequences of MaNIPs. Residues comprising the ar/R filter are marked in red box and labeled as H2, H5, LE1 and LE2. Amino acids with high identities were shown in black background.



|           |                                           |     |
|-----------|-------------------------------------------|-----|
| S1SIP1-1  | .....MGVIAKAAIADGLLITFL                   | 16  |
| MaSIP1-1  | .....MGAIRAAAADGLLITFL                    | 16  |
| MaSIP2-1  | MLDQKEFVNKKETDVEEEKEHSNQASRVKLIIVSDSFLSFM | 40  |
| MaSIP2-2  | .....MGRLGLVMDAAMSFM                      | 16  |
| Consensus | d f                                       |     |
| S1SIP1-1  | WVFCSSNIGVSTYFIASYFGIVNEIPSLFITTLIVFVIFL  | 56  |
| MaSIP1-1  | WVFCVSTVRAATSLVTAALQIQGVAFSLFVITTLIFALVF  | 56  |
| MaSIP2-1  | WVLSG...SVIRYLIYMIILGTGMDPISVLLKGYLALVYLY | 77  |
| MaSIP2-2  | WWWAG...ALVKLLVYDALGLGHRFGGEALKMAIVVGVMF  | 53  |
| Consensus | wv                                        |     |
|           | H2                                        |     |
| S1SIP1-1  | MEDFLGDVIGGAGFNFTGNAAFYAAGLGDDSTVSAAVRCP  | 96  |
| MaSIP1-1  | VEGLITAAIGGASFNFTATAAFYAAGLGSDNLSMAIRFP   | 96  |
| MaSIP2-1  | YFSQLRKVTNGGTYNPLFVLCHAISDNFVEEFLYAVFGRIP | 117 |
| MaSIP2-2  | LEAWLGHVTRGGAYNPLTVLSYAFSGGPEGFLFTALGRIP  | 93  |
| Consensus | f g np l r p                              |     |
| S1SIP1-1  | ACVAGAVAGSLAIVELIFKHYHHMLDGEPIKVDVQTGAIA  | 136 |
| MaSIP1-1  | ACAPGAVAGALAIMEVMEFPQHKRMLGGFSIKVDLHTGALA | 136 |
| MaSIP2-1  | ACVIGSVIGVWLINATFFAAAN...GFRINVDVSYGALI   | 153 |
| MaSIP2-2  | ACVIGSATGVRFIKQTFESIGH...GFRISIDIHARGAWT  | 129 |
| Consensus | aq g g p gp l d ga                        |     |
|           | H5                                        |     |
| S1SIP1-1  | EGVITFVITFMIFVIVLRGPEVLLKRWLLTMVTLPLVLA   | 176 |
| MaSIP1-1  | EGVITFIIITLAVLWIIIRGFRSPVVKIWMVAVSTVAMVVA | 176 |
| MaSIP2-1  | EGLITFAIIIVSLGLNKFFRSS...HKTWISSFAKLALHVL | 191 |
| MaSIP2-2  | EGFITFMIVMASIMLKKKDPGSFFMKTWISSIFKLAINVL  | 169 |
| Consensus | eg t f i s k w                            |     |
|           | LE1 LE2                                   |     |
| S1SIP1-1  | GSNETGFSMPNPAFAFGWAYLSNTHKTLHFYVYWISFFIG  | 216 |
| MaSIP1-1  | GAGYTGFAMNPAFAFGWAYINNRRHTWEQFYVYWIQFFIG  | 216 |
| MaSIP2-1  | ASDITGGVMNPASAFGWAYAQGKHITKEHLCVYWLAFLEA  | 231 |
| MaSIP2-2  | GSDITGGIMNPASAFAWAYARGDHTLDQLIVYWFAPICA   | 209 |
| Consensus | tg mnpa af way h t vyw p                  |     |
| S1SIP1-1  | AILAAWIFRVLFPPPEVEQKPKQKQKRN...           | 242 |
| MaSIP1-1  | AIVAGWFFRIIFP...QRAEKAKKA...              | 238 |
| MaSIP2-1  | TLIVVWICSLFIKLPKRRKQHEMQRKDKL             | 260 |
| MaSIP2-2  | TLAVWTFGLLITE.PKSKVQKAEENKVK              | 237 |
| Consensus | w                                         |     |

**Figure S5.** Alignment of amino acid sequences of MaSIPs. Residues comprising the ar/R filter are marked in red box and labeled as H2, H5, LE1 and LE2. Amino acids with high identities were shown in black background.

**Table S1.** The amino acids of banana AQPs.

>MaPIP1-3

MIFALVYCTAGISGGHINPAVTFGLFLARKLSLTRAIFYMVMQCLGAICGAGVVKGFKGVYENNGGGANVVAAG  
YSKGDGLGAEIVGTFILVYTVFSATDAKRNARDSHVPILAPLPIGFAVFLVHLATIPITGTGINPARSLGAAIHYNKDHA  
WDDHWIFWVGPFIGAALAAFYHQIVIRAIPFKSRS

## &gt;MaPIP1-2

MIFALVYCTAGISGGHINPAVTFGLFLARKLSLTRALFYMVMQCLGAICGAGVVKG YQKGLYESNNGGGANVVAPG  
YTKGDGLGAEIVGTFILVYTVFSATDAKRNARDSHVPILAPLPIGFAVFLVHLATIPITGTGINPARSLGAAIYNKKH  
AWDDHWIFWVGPFIGAALAAIYHQIVIRAIPFKSRP

## &gt;MaPIP1-9

MIFILVYCTAGISGGHINPAVTFGLLLARKLSLTRALFYMVMQCLGAICGAGVVKGFKKGLYENNGGGANVVAPG  
YTKGGGLGAEIVGTFILVYTVFSATDAKRSARDSHVPVLAPLPIGFAVFLVHLATIPITGTGINPARSLGAAIVYDKSH  
AWNDDHWIFWVGPFIGAALAAAMYQQIVIRAIPFKSRP

## &gt;MaPIP2-9

MIFILVYCTAGISGGHINPAVTFGLFLARKISLVRALLYMIAQCLGAICGVGLVKGFQSAYYVRYGGGANELSDGYS  
KGTGLAAEIIGTFVLVYTVFSATDPKRNARDSHVPVLAPLPIGFAVFMVHLATIPITGTGINPARSFGAAVIYNKDKA  
WDDQWMFWVGPFIGAAVAAAYHQYILRASGAKALGSSSSI

## &gt;MaPIP1-4

MIFALVYCTAGISGGHINPAVTFGLFLARKLSLTRAIFYMVMQCLGAICGAGVVKGFKGVYQSNGGGANVVASG  
YSKGDGLGAEIVGTFILVYTVFSATDAKRNARDSHVPILAPLPIGFAVFLVHLATIPITGTGINPARSLGAAVIYNKDH  
AWDDHWIFWVGPFIGAALAAALYHQVVIRAIPFKSRS

## &gt;MaTIP1-6

MPIPRIAVGTQEEATHPGTLKAALAEFISTLIFVFAGQGSGMAFSKLTGGAATTPAGLIAAALAHAFALFVAVSVGAN  
ISGGHVNPVAVTFGVFIGGNITLLRSIIYWIAQLLGSTVACLLLRYSTGGLSTGSFALSGVSVWEALVLEIVMTFGLVY  
TVYATAVDPKKGSLGTIAPIAIGFIVGANILAGGAFDGMNPVAVSFGPALVSWSWDDHWVYWAGPLIGGGLAGLV  
YEFFFISHTHEQLSSADY

## &gt;MaPIP2-6

MSKEVSVEVEQPPAKDYSDPPPAPLLDFGEVRLWSFYRALIAEFVATLLFLYVSIATVIGHKEQNAADQCSGVGLLG  
IAWAFGGMIFILVYCTAGISGGHINPAVTFGLFLARKVSLIRAVLYIVAQCLGGIVGVGIVKGIMKHQYNSLGGANV  
VATGYSKGTALGAEIIGTFVLVYTVFSATDPKRSARDSHVPVLAPLPIGFAVFMVHLATIPITGTGINPARSLGAAVIY  
NQDKAWDDHWIFWVGPFIGALAAAAYHQYILRAAAIKALGSFRSNPSN

## &gt;MaNIP3-2

MHQYLIQQILTKNTLKPPLAMPEPETPNVSAPATPGTPGAPLFNSLRVDSLSYDRKSMPRCNRCPLSWASSPHT  
CFIELPKPDVSLTRKLGAIEFVGTFILIFGATAAPIVNQKYNGAETLIGNAACAGLAVMIVILSTGHISGAHLNPSLTIAF  
AMLRHFPWAHVPAIYLAQVSASICASFALKAVFHPFLSGGVTVPSVSPQAFFIEFLITFNLLFVVTAATDTRAVGEL  
AGIavgatvmlnIlvAgpSSGSMNPVRTLGPAVAAGNYERIWIYLVAPTAgAVTGAAVYTAVKLKEEDGEMPRQQ  
LLEDYPRHTRYALQNDswIVASyFYLCsvKHIFLLQMLNCEYCKLR

## &gt;MaTIP4-1

MRKITLGSRNEAVEPDFVRSVFTELLLTFLFVFAGVGAVMTAEEVAGGEDRIMWVVAAPAAAQAMLVAMITAVGL  
DVSAGHLNPAVTIGFAAGGYVTVVRCVLYVIAQLLGSSMACLLKLYVAAGLDVLPVHALAAGMDPLQGVIMEAV  
FTFSMVFAIYALIMDPKKGAIGSAPLLIGLTVGANSLAGGAFSGASMNPARSFGPALANWDWTNHVVYWLGPLV  
GSGLAGFAHHHLYVAGTHGVLLPKDDEVGF

>MaPIP1-7

MIFALVYCTAGISGGHINPAVTFGLLLARKLSLNRALFYMVMQCLGAICGAGVVKGFKGLYQSNNGGGANVVAAG  
YTKGDGLGAEIVGTFILVYTVFSATDAKRNARDSHVPILAPLPIGFAVFLVHLATIPITGTGINPARSFGAAVIYNKDH  
AWDDHWIFWVGPFIGAALAALYHQVVIRAIPFKNRT

>MaTIP3-2

MPPRRFAFGRAEDAVHPDTMRAALSEFIATLFFVAAEGSVLSLGKLYKDTSTAGGLVVVAIAHALALSVAVSVSLN  
ISGGHVNPVAVTLGALVGGRISLILAVFYWVAQLLGAVVAALLRLATGGMRPLGFGVASGVSEGHAVLLEIVMTFGL  
VYTVYATAIDPRRGHLGIIAPLAIGFILGANILAGGPFDDGAAMNPARAFGPAVVGWRWKSHVVYWVGPLVGAALA  
GLIYEFLVIPDETPTHQPLAPEDY

>MaPIP2-7

MSKEVSEAEQAPAKDYRDPAPLLDFGELRLWSFYRALIAEFVATLLFLYVTIATVIGHKEQNAADQCSGVGILGIA  
WAFGGMIFILVYCTAGISGGHINPAVTFGLFLARKVSLIRALLYIVAQCLGAIVGVGIVKGIMKHQYNSLGGGANEV  
ASGYSGKTALGAEIIGTFVLVYTVFSATDPKRSARDSHVPVLAAPLPIGFAVFMVHLATIPITGTGINPARSLGAAVIYN  
QDKPWDDHWIFWVGPFVGAALAAAYHQYILRAAAIKALGSFRSNPTN

>MaPIP2-5

MIFILVYCTAGISGGHINPAVTFGLFLARKVSLIRALLYMIGQCLGAICGVGLVKGFQKAFFVRYGGGANELSDGYS  
KGTGLAAEIIGTFVLVYTVFSATDPKRSARDSHVPVLAAPLPIGFAVFMVHLATIPITGTGINPARSFGAAVIYNKDKA  
WDDQWIFWVGPLIGAAIAAAYHQYILRAGAVKALGSFRSNA

>MaTIP5-1

MSSKLLCFFTSGVNFWSAASLRSYLAEFISTFFFVFAAVGSAISARMLTPDVTSDASSLVATALAQGFALFAAVYIA  
ADISGGHVNPVAVTFGLAVAGHIGVPTAIFYWISQLGGSILACLLLRVASAGQAIPTTGIGTEMGTGGGAVVESAITFIL  
VYTVYVAADPGGGGGDGKRKRKMREVAGPLAVGLTAGACVLAAASLTGGSMNPARSFGPAVVSGNFKNHAVY  
WVGPLIGAAALALVHQYLVFPSASSDAYPNSTV

>MaTIP3-1

MPPRRFAFGRTDDAVHPDTMRAALSEFIATLFFVAAEGSILSLGKLYKDTSTAGGLVVVAIAHALALAVAVIAFNI  
SGGHVNPVAVTLGALVGGRISLVRVAVFYWVAQLLGAVVAALLRLATGGMRPVGFSVASGVSDWHAVLLEIVMTFG  
LVYTVYATAIDPKRGHLGTIAPLAIGFILGANILAGGPFDDGAAMNPARAFGPALIGWRWKHHVVYWVGPFIGAAL  
AGVMYEFLMIPAEAPRTHQPLAPEDY

>MaPIP2-10



MIFILVYCTAGISGGHINPAVTLGLFLARKVSLIRALLYMVAQCLGAIVGVGIVKGIMKHQYNSLGGGANMVAAGY  
SKGTALGAEIIGTFVLVYTVFSATDPKRSARDSHVPVLAPLPIGFAVFMVHLATIPITGTGINPARSLGAAVIYNQDKP  
WDDHWIFWVGPFVVGALAAAAYHQYILRAAAIKALGSFRSNPTN

>MaPIP1-1

MIFALVYCTAGISGGHINPAVTFGLFLARKLSLTRAVFYMMVMQCLGAVCGAGVVKGFKGVYESNNGGGANVVASG  
YSKGDGLGAEIVGTFILVYTVFSATDAKRNARDSHVPLLAPLPIGFAVFLVHLATIPITGTGINPARSLGAAIYNKDH  
AWDDHWIFWVGPFIGAALAAIYHQVVIRAIPFKNRS

>MaTIP1-5

MPISRIAIGTTEEATHPSALKAAALAEFICTFIFVFAGQGSGMAYSKMTSGGAATPTGLIMAALAHAFALFVAVSVGA  
NISGGHVNPAVTFGAFVGGNITLLRGVLYWVAQLLGSTAACLLHFATGGLETGTGFLSSGVGVWEALVLEAVMTF  
GLVYTVYATAVDPRRGSGLAIAPIAIGFIVGANILVGGAFDGASMNPAVSFGPALVSWSWTHQWVYWLGPLSGGAL  
AGLVYEIFFICSTHEQLASADY

>MaNIP2-3

MASHGTRPTTTACNEIHDAVTTHTSISPSLLHRKSLEELFPPFLAEKVVAETIATFLLVFVTCGSAALSKSEAGAVSQL  
GASVAGGLIVTVMYAVGHISGAHMNPAVTLAFAVSRHFPWIQVPFYISAQISGAMVSSFVLRELLHPITDLGTTTPS  
DTALKALVMEIVVTFMFMFVTSAVATDSKAVGELAGLAVGSAVCITSILAGPISGGSMNPARTLGPALASRNYDAL  
WVYLLGPVVGTLGAFSYSFIRMTEKQPLSTTTQKLSSFKLRLQLSQDMPSPLADASGRV

>MaSIP1-1

MGAIRAAAADGLITFLWVFCVSTVRAATSLVTAALQIQGVAFSLFVTTTLIFALVFVFGFLITAAIGGASFNPATATAAFY  
AAGLGSDNLLSMALRFPAQAAGAVAGALAIMVMPQHKRMLGGPSLKVDLHTGALAEGVLTFIITLAVLWIIIRG  
PRSPVVKTWMAVSTVAMVVAGAGYTGAMNPANAFGWAYINNRRHNTWEQFYVYWICPFIGAIVAGWFFRIIFPQ  
RAEKAKKA

>MaSIP2-1

MLDQKEFVNKKETDVEEEKEHSNQASRVKLIVSDSFLSFMWVLSGVSIRYLIYMILGTGMDPISVLLKGYLALVYL  
YYFSQLRKVTNGGTYNPLFVLCHASDNFVEFLYAVFGRIPAQVLGSGVIGVWLNATFPAAANGPRLNVDVSYGALI  
EGLITFAIIIVSLGLNKFPRSSHKTWISSFAKLALHVLASDITGGVMNPASAFGWAYAQGHILTKEHLCVYWLAPLE  
ATLLVWICSLFIKLPKRKRQHEMQYKDKLV

>MaSIP2-2

MGRGLGLVMCDAAMSFMWVWAGALVKLLVYDALGLGHRPGGEALKMALVVGYMFLFAWLGHVTRGGAYNPLT  
VLSYAFSGGPEGFLFTALGRIPAQVIGSATGVRFIKQTFPSIGHGPRLSIDIHRGAWTEGFLTFMIVMASLMLKKKDP  
GSFFMKTWISSIFKLALNVLGSDLTGGIMNPASAFAWAYARGDHITLDQLIVYWFAPIQATLLAVWTFGLLTEPKSK  
VQKAEENKVKSE

>MaNIP2-4

MKCLKRSEIFSQPGRTQEDHTLRRSSSWRLEMASQTRPNISNEIHDIDVVTAAQSSVSPRLHHESLRELFPFLARKV  
VAEMISTFLLVFVTCGAGALNKSNSGVVSQLGASVAGGLIVTVMYAVGHISGAHMNPAVTFAFVSRHFPWIQVPF

YMCAQISGAMVASFVLRELLHPITNLGTTTPSDTAAKALVMETVVTFCMMFVTSAVATDTKAVGELAGLAVGSSV  
CITSILAGPVSGGSMNPARTLGPASRNYQSLWVYFVGPVLGTVSGSFSYSFIRMTEKQQHTTAAQKLSSFKLRL  
QSQEMASPTSNAFENV

>MaTIP2-4

MAGIAFGRFDDSFVSGSLKAYLAEFISTLLFVFAGVGSIAIYNKLTSSAALDPAGLVIAIVCHGFALFVAVSVGFNIS  
GGHVNPVAVTFGLALGGQITILTGILYWISQLLGAVVGAFLKFKSTGLDTPHGLGAGVGAGEGVVMEIITFALVYT  
VYATAADPKKGSGLTIPIAIGFIVGANILAAAGPFSGGSMNPARSFGPAVASGDFSDLWIYFVGPLIGGGLAGLVYTY  
AYLLHDHQPLPQ

>MaNIP1-1

MEEGAAGDGREEGVNPDHGYASSADKGCGLSLIPFLQKILAEIFGTYFLIFAGCASVTVNLSKGMITFPGICVWWG  
LAVMVMVYSVGHISGAHFNPAVTIAFATCGRFPWKQVPAYVFAQLLGATLASGTLRLMFGGKHEHFPGTIPAGSDV  
QSLVLEFIISFYLMFVISGVATDNRAIGELAGLAVGATILLNVLIAGPISGASMNPARTLGPVAVANRWEGFWVYIVGP  
ICGTVVGAWAYNLIRFTNKPLREITKSGSFLKSFRNNST

>MaTIP1-4

MPILRITIGTPEEARHPTALKAAALAEFISVLIFVFAGQGSGMAFNKLTDDGSTTPAGLVASASLAHGFGLYVAVAVGAN  
ISGGHVNPVAVTFGAFLGGNITLLRGILYWIAQLLGSVVACLLKFKATGGLETPFSLSSSVTVWNALVFEIVMTFGLV  
YTVYATAIDPKKGNLGHAPLAIGLVVGANILAGGAFDGAASMNPAVSFGPAVSVSWTDNHWVYVWVGPLLGGGIAA  
LVYDGVFIGFGTHEQLPTTDY

>MaPIP1-8

MIFALVYCTAGISGGHINPAVTFGLLLARKLSLTRAIFYVVMQCLGAICGAGVVKGFQKGVYESNGGGANVVAAG  
YTKGDGLGAEIVGTFILVYTVFSATDAKRSARDSHVPVLAPLPIGFAVFLVHLATIPITGTGINPARSLGAAIYNKEH  
AWNDDHWIFWVGPLIGAALAAIYHQVVIRAIPFRSKR

>MaTIP1-1

MPFSQIAIGRPEEATHPSALKAAALAEFICTLIFVFAGQGSGMAYNKLTSDDGAATPAGLIAAALAHGFALFVAVSVGA  
NISGGHVNPVAVTFGAFFVGGNITLLRGILYWIAQLLGSTVACLLRFSTGGLETGTGFLSGVSAWEALVLEIVMTFGL  
VYTVYATAVDPKKGSGLTIPIAIGFIVGANILVGGPFSGASMNPAVSFGPALVSWSWTHQWIYWLGPLIGGGLAGI  
VYEFFFISHSHEQLPTTDY

>MaPIP2-4

MIFILVYCTAGISGGHINPAVTLGLFLARKVSLVRALLYMVAQCLGAICGVGLVKGFQEAYFVRYGGGANELSAGY  
SKGTGLAAEIIGTFVLVYTVFAATDPKRNARDSHVPVLAPLPIGFAVFMVHLATIPITGTGINPARSLGAAVIYNQDK  
AWDDQWIFWVGPFVGAIAAAAYHQYVLRASGAKAMGSFGSNA

>MaPIP2-13

MIFVLVYCTAGISGGHINPAVTFGLFLARKVSLRAVFYMAQCMGAICGVGIVKGIMKHQFNRFGGGANVVAPG  
YSKGTALGAEIIGTFLLVYTVFAATDPKRRARDSHVPVLAPLPIGFAVFMVHLATIPITGTGINPARSFGPAVIYNRHK  
PWHDDHWIFWVGPFVGAALAEVYHQHVLRAANVKTLGSFRSSRSNC

## &gt;MaPIP2-11

MIFILVYCTAGISGGHINPAVTLGLFLARKVSLLRVVMYMAQCLGAICGVGIVKGIMKHQFNAFGGGANSVAAGY  
 SKGTAFGAESIGTFVLVYTVLSATDPKRSARDSHVPVLAPLPIGFAVFMVHLATIPITGTGINPARSFGA AVIYNQHKP  
 WHDHWIFWVGPFV GALAAVYHQYVLR AAALKALGSFRSSRSN

## &gt;MaNIP4-1

MVYSVGHISGAHFNPAVTTTFTILKQFPLKQLPLYMVAQLVGAILASGAVYLLFDPKAEHFYGTTPVGS AVQS FVLE  
 IISFLLMFVISGVATDTRAIGELAGI AVGSTILLNVLVAGPISGASMNPARSIGPAIVMRNYKAIWAYVLGPMIGTLAG  
 GFTYNLVRYTDKPLREITKSSSFLKS VSRNR

## &gt;MaTIP4-2

MARIKLGSRKEMTDPEFARSVLTELLLTFLFVFVGVAASMTAGKMAGGQDSIMGLTAVAVAQAMLVAVMVA VGLD  
 VSAGHLNPAVTIGFAAGGYVTVFRCVLYVIVQLLGSSMACLLQYIAGGQAVPVHALGVGIGPLQGAIMEVVLTF S  
 MVFSIYAIIVDPKKGIVSVLAPLLIGLIVGANTLAGGPFSGASMNPARSFGPALATWDWTNHVWVWAGPFVGSGLA  
 GFVYDHLVLMRPRDDLPGDEESITKPLC

## &gt;MaTIP2-2

MAGIAFGQFDDSFSGTLKAYLAEFISTLLFVFAGVGSIAIYNKLTSSAALDPAGLVIAIVCHGLALFVAVSVGANIS  
 GGHVNP AVTFGLALGGQITILTGIFYWVAQLLGAVVGAFVLVKFATGLDTPTHGLGDGVGAGEAVVMEIIITFALVYT  
 VYATAADPKKGS LGTIAPIAIGFIVGANILAAGPFSGGSMNPARSFGPAVASGNFSDLWIYWVGPLIGGGIAGLVYTY  
 AYMCS DHQPLPQ

## &gt;MaNIP2-1

MASSHVRPNNSNEIHDIDVVTAQTLTTPSFDPVHRRRNKELFPPFLPRKVVS EMIATFLLVFTCGAGALNKN  
 NPGVVSQLGQSVAGGLIVTVMYAVGHISGAHMNPAVTLAFAVARHFPWIQVPFYMLAQIAGSTTASYILRELLDPI  
 HDLGTTPSHTAAKALVAEIVVTFNMMFVTA AVATDTKAVGELAGLAVGSAVCITSILAGPISGGSMNPARTLGPAL  
 ASNKFD SLWVYFVGPPVGT VAGALAYSFIRLDEHSLSSQKDSQKSPSLKMRRVQSQDMASPTNDAFESGV

## &gt;MaPIP1-6

MGVVKSSTKCSTVGIQGIAWAFGGMIFALVYCTAGISGGHINPAVTFGLFLARKLSLTRALFYMVMQCLGAICGAG  
 VVKGFQKGLYENNGGGANVVAPGYTKGDGLGAEIVGT FILVYTVFSATDAKRSARDSHVPILAPLPIGFAVFLVHL  
 ATIPITGTGINPARSLGAAIYNKGHAWDDHWIFWVGPFIGAALAAALYHQVVIRAIPFKSRS

## &gt;MaTIP1-2

MPIGSIAIGAPGEASHPDTIKASLAEFISTLIFVFAGEGSGMAFNKLTNDGSTTPAGLVAA SLAHGFALFVAVSVGANI  
 SGGHVNP AVTFGAFLGGNISLIRGILYWIAQLLGSSVACLLKLATGGLETSAFSLSSDVSVWNAVVF EIVMTFGLV  
 YTVYATAVDPRKGDLGVIAPIAIGFIVGANILAGGAFDGASMNPAVSFGPAVVS WTWDNHVWVWVGPLIGAAIAAL  
 VYDGVFIGQATHEQLPPSDY

## &gt;MaTIP2-5



MACIAFGRCDSDSATSLSKAYLAEFISTLLFVFAGVGSIAIAYGKLTSGAALDAAGLVAVALCHGLALFVAVAIANIS  
GGHVNPVAVTFGLALGGQITILTGLLYWVAQLLGAVVGAFLKLFATGLDTPHSLGVGAVEGVVMEIITFALVYTVY  
ATAVDPKRGSLGTVAPIAIGLIVGANILAAGPFSGGSMNPARSFPGPAVASGDFADLVVYVWGPLIGGGLAGLVYTYA  
YMCTDHTPLPQ

>MaNIP2-2

MASSTRPNSSNEIHDIDVVTAQNSYISPTLLHQKSLKEVFPPFLARKVVAETIATFLLVFATCGSAALSKSNPGLVSQ  
GASVAGGLIVTVMIYAVGHISGAHMNPVTLAFAVARHFPWIQVPFYMAAQISGAMIASFVRELLHPITDLGTTAP  
SDTAVKALVMEIVVTFMCMFVTSAVATDTKAVGELAGLAVGSSVCITSILAGPISGGSMNPARTLGPAVASSNYDSL  
VVYFLGPVLGTLGACSYSFIRMTETQPQATAAQKLSSFKLRLQSLEMASPTNNAFDNI

>MaTIP4-3

MAKIALGNHHEAAEPGCIRAVLAEVVLTFLFVFAGVGAAMAAEKMVGGD SIMGLTAVAVAHALVVAVMISAGLHI  
SGGHLNPAVTLGLAVGGHVTVVRSLLYVVAQLLGSTLACLLKYLTTGGLDTPVHTLAAGMGAVQGVIMEIVLTFSL  
LFSVYATMVDPPKKGIAGLGPLLVLVVGANILAGGPFSGASMNPARSFPGPALAAWNWDHWIYVWGPLAGGG  
AGLVYEHLFMVSTHVPLPREDEGF

>MaPIP2-3

MIFILVYCTAGISGGHINPAVTFGLFLARKVSLVRAFLYIVAQCLGAICGVGLVKGFQKAYFVRYGGGANELSDGYS  
KGTGLGAEIIGTFVLVYTVFAATDPKRSARDSHVPVLAPLPIGFAVFMVHLATIPITGTGINPARSFGAAYIYNKDKA  
WDDQWIFWVGPAIGAAIAAAYHQYVLRASGVKALGSFRSSA

>MaTIP1-3

MPITQIAIGTTAEATHPTALKAAALAEFICTFIFVFAGQGSGMAYNKLTS DGAATPEGLIAAALAHGFALFVAVSVGAN  
ISGGHVNPVAVTFGAFVGGNITLLRGILYWIAQLLGSTVACLLLRFTSTGGLETGTGFLTGVSVWEALVLEIVMTFGLV  
YTVYATAVDPKKGSLGTIPIAIGFIVGANILVGGPFDGASMNPAVSFGPALVSWSWTHQWVYWLGP LIGGALAGIV  
YEIFFISHSHEQLPTADY

>MaTIP2-3

MVKLTGSLGDSFSAGSLKAYLAEFIATLLFVFAGVGSIAIAYGKLTSGAALDPAGLVAVALAHGLALFVGVSM AANI  
SGGHLNPAVTFGLAVGGHITLLTG VFYWIAQLLGSTVACLLLKFTVTGGMAVPTHGVAAGMSELEGVVM EVVITFAL  
VYTVYATAADPPKKGPLGTVAPIAIGFIVGANILAAGPFSGGSMNPARSFPGPAVASGDFSGNWVYVWG PLIGGGLAG  
LIYGDIFIGSYEAVAAQDYP

>MaPIP1-5

MGVVKSDTKCSTVGIQGIAWAFGGMIFALVYCTAGISGGHINPAVTFGLFLARKLSLTRALFYMVMQCLGAICGAG  
VVKGFRKGLYESNGGGANVVAAGYTKGDGLGAEIVGTFILVYTVFSATDAKRNARDSHVPILAPLPIGFAVFLVHL  
ATIPITGTGINPARSLGAAYIYNKD HAWDDHWIFWVGPFIGAALAAMYHQVVIRAIPFKSRP

>MaTIP2-1

MVKLALGSLGDSFSVSLKSYLAEFIATLLFVFAGVGSIAIAYGKLTGGAALDPAGLVAVALAHGLALFVGVSM AAN  
ISGGHLNPAVTFGLAVGGHITILT GIFYWVAQLLGSTVACLLLKFTVTGGLAVPTHGVAAGMSELEGVVM EVVITFAL

VYTVYATAADPKKGS LGTVAPIAIGFIVGANILAAGPFSGGSMNPARSFGPAVASGDFAGNWVYVWGPLIGGGLAG  
LIYGDIFIGSYQPVA AQDYP

>MaNIP1-2

MSRAGEACCS DGSEERFVEERSAADRGEERVTL DHAGGGSCSAEACVFTFSFCFFQKIIAEILGTYFMIFAGCGSVA  
VNLSTGIVTFPGICLAWGLVVMAMVYSLGHVSGAHFNPAVTIAFATCGRFPWRQVPAYVSAQVLGSTISIGTLRLLF  
GGKHGQFLGTV PAGSDLQSLVLEFIISK TLMFVISGVATDSRAIGELAGLVVGATVVVNVLFAGPISGASMNPARS L  
GPAIIANRWEGLWVYIVGPICGTVLGAWAYNLIRFTDRPLLEITNTATASFLKRLTRKDSA

>MaNIP2-5

MASFNEIHDIDVVT VQTLAAEDDFVPAARLRRRKCFQEIFPPFLLRKVIAEVIATFLLVFVTCGAGALNKNNPRVVS  
QLGASVAGGLIVTVM IYAVGHISGAHMNPAVTLAFAVSRHFPWIQVPFYWSAQFSGAMIASFILRELLHPITDLGTTT  
PSSTPARSLIMEVVVTF SMMFVTSAVATDTKAVGELAGAVGSAVCITSILAGPISGGSMNPARTLGPAVASRKYDAL  
WVYFVGPVLGTL SGTMSYRFIRMTEKQPPQSLPSMGSS TAPKSPSTSLKLRRLLQSQEMASPAHVNP

**Table S2. The full length cDNAs of banana AQPs.**

>MaNIP1-1

ATGGAGGAGGGAGCCGCTGGTGATGGGAGAGAAGAGGGCGTCAACCCTGA  
CCATGGATATGCGAGCTCTGCCGACAAAGGTTGTGGGTTGAGCTTATCTA  
TTCCTTTCTTG CAGAAGATCCTTGCTGAAATATTCGGGACATACTTTCTG  
ATCTTCGCGGGATGTGCTTCGGTCACTGTAAATCTGAGCAAGGGAATGAT  
CACCTTTCCGGGCATCTGCGTCGTGTGGGGGCTCGCCGTCATGGTCATGG  
TGTA CTCCGTCGGCCACATATCCGGTGCCCACTTCAACCCGGCCGTCACG  
ATCGCCTTCGCCACATGCGGGAGGTTCCCATGGAAACAGGTGCCAGCTTA  
CGTTTTTGCTCAGCTTCTGGGCGCGACGCTGGCGAGCGGCACGCTGCGTT  
TGATGTTCCGGGGGAAGCACGAGCACTTCCCGGGGACGATACCGGCCGGC  
TCGGACGTGCAGTCGCTTGTTCTCGAGTTCATTATCTCGTTCTACCTGAT  
GTTTGTGATCTCGGGAGTGGCCACCGACAACAGAGCAATCGGAGAATTGG  
CGGGGTTAGCAGTCGGAGCTACAATCTTATTGAATGTGCTCATCGCCGGG  
CCTATCTCGGGAGCATCGATGAACCCGGCGAGGACGCTGGGGCCGGCGAT  
CGTGGCCAACCGGTGGGAGGGGTTCTGGGTCTACATCGTGGGTCCCATCT  
GTGGGACCGTGGTGGGGGCGTGGGCTTACAACCTCATTCGCTTCACCAAC  
AAGCCCCCTCGTGAGATCACC AAGAGCGGCTCCTTCCTCAAGAGCTTCAG  
GAACA ACTCCACCTGA

>MaPIP1-9

ATGATCTTTATCTTGGTCTACTGCACCGCTGGGATCTCAGGTGGCCACAT  
CAACCCGGCTGTGACCTTTGGGCTGCTCCTGGCCAGGAAGCTGTCCCTGA  
CCAGGGCTCTGTTCTACATGGTGATGCAGTGTCTAGGTGCCATATGCGGT  
GCGGGCGTGGTGAAAGGGTTTAAGAAGGGGCTCTATGAGAACAATGGAGG

TGGAGCGAATGTTGTGGCCCCCTGGTTACACCAAGGGTGGTGGCTTGGGTG  
CTGAGATTGTTGGCACCTTCATCCTGGTTTACACAGTCTTCTCTGCCACT  
GATGCCAAGAGGAGTGCTAGGGACTCTCATGTGCCTGTTCTTGCTCCCTT  
GCCTATTGGATTTGCAGTGTTCCTTGTTACCTGGCCACCATCCCCATCA  
CCGGCACTGGCATCAATCCTGCCAGAAGCCTTGGAGCTGCAATTGTTTAT  
GACAAGAGCCATGCATGGAATGATCATTGGATTTTCTGGGTGGACCATT  
CATTGGAGCTGCTCTTGCTGCTATGTACCAACAGATAGTTATCAGGGCAA  
TCCCATTC AAGAGCAGGCCATGA

>MaTIP2-5

ATGGCTTGCATCGCCTTCGGCCGCTGCGATGACTCCTTCAGCGCCACCTC  
GCTCAAGGCCTACCTCGCCGAGTTCATCTCCACGCTCCTCTTCGTGTTCG  
CCGGCGTCGGCTCTGCCATAGCTTACGGCAAGTTGACGTCGGGCGCGGCC  
CTCGACGCGGCGGGGCTCGTGGCGGTGGCCCTCTGTCACGGGCTCGCCCT  
CTTCGTGCGCGTCGCGATCGCCGCCAATATCTCCGGCGGCCACGTGAACC  
CGGCGGTACCTTCGGATTGGCTCTCGGGGGGCAGATCACCATCCTCACC  
GGACTCCTCTACTGGGTGCGCGAGTTGCTCGGCGCAGTCGTGCGCGGTT  
CCTCCTCAAGTTCGCTACCGGACTCGACACGCCAACCCTAGTTTGGGAG  
TGGGAGCCGTGGAGGGAGTGGTGATGGAGATCATCATCACCTTCGCACTC  
GTGTACACGGTGTACGCCACCGCCGTCGACCCAAAGAGGGGCTCCCTCGG  
CACGGTCGCCCCCATCGCCATCGGCCTTATCGTCGGAGCCAACATCCTCG  
CCGCCGGCCCCCTTCTCCGGCGGCTCCATGAACCCCGCGCGCTCCTTCGGG  
CCGGCAGTGGCGAGCGGCGACTTCGCCGACCTGTGGGTTTACTGGGTGCG  
TCCACTTATTGGTGGTGGGCTGGCTGGGCTTGTCTACACCTATGCCTACA  
TGTGCACCGACCACACTCCGCTCCCCCAGTAA

>MaTIP2-3

ATGGTGAAGCTCACATTGGGAAGCCTGGGCGACTCTTTCAGCGCGGGGTC  
TCTCAAGGCCTATCTTGCTGAGTTCATCGCCACCCTCCTCTTCGTGTTCG  
CTGGCGTTGGCTCCGCCATTGCATATGGTAAGTTGACGTCTGGTGCAGCG  
CTGGATCCGGCGGGCCTGGTTGCGGTGGCCCTCGCTCATGGCTTGGCCCT  
CTTCGTGCGCGTCTCCATGGCGGCCAACATCTCCGGTGGCCACCTTAACC  
CGGCTGTCACTTTCGGGCTCGCCGTGGGCGGCCACATCACCCTCCTCACC  
GGCGTCTTCTACTGGATCGCCCAGCTCCTCGGCTCCACCGTCGCCTGCCT  
CCTCCTCAAGTTCGTACCGGCGGCATGGCTGTACCGACGCACGGCGTGG  
CGGCCGGCATGAGTGAGCTGGAAGGCGTGGTGATGGAGGTGGTCATCACC  
TTCGCGCTCGTGTACACGGTGTACGCCACGGCGGCGGACCCGAAGAAGGG  
GCCGTTGGGGACGGTGGCGCCCATCGCGATCGGGTTCATCGTCGGGGCCA  
ACATCCTGGCAGCCGGGCCCTTCAGCGGCGGCTCCATGAACCCGGCACGG  
TCCTTCGGCCCCGCGGTGGCCAGCGGAGACTTCTCCGGCAACTGGGTCTA  
CTGGGTGGGGCCGCTGATCGGCGGCGGACTGGCCGGGCTCATCTACGGCG  
ACATCTTTATCGGCTCCTACGAGGCGGTGCGGGCGCAGGACTATCCGTAA



## &gt;MaTIP4-3

ATGGCCAAGATCGCGCTCGGGAACCACCACGAGGCGGCCGAGCCCGGCTG  
CATCCGCGCCGTGCTAGCTGAGGTGGTCCTCACCTTTCTCTTCGTCTTCG  
CTGGGGTCGGCGCCGCCATGGCCGCGGAGAAGATGGTGGGCGGGGACTCC  
ATCATGGGGCTGACGGCGGTGGCGGTGGCTCACGCGCTGGTGGTGGCGGT  
GATGATATCGGCGGGACTCCACATCTCCGGCGGCCACCTGAACCCGGCGG  
TGACGCTGGGGCTGGCCGTGGGGGGGCACGTCACCGTCGTCCGGTCGCTG  
CTGTACGTGGTGGCCCAGCTGCTGGGTTCCACCCTGGCCTGCCTTCTCCT  
CAAATACCTCACTGGTGGACTGGATACTCCGGTGCACTCTGGCTGCTG  
GGATGGGTGCCGTACAAGGAGTGATCATGGAGATAGTGCTCACCTTCTCC  
CTGCTCTTCTCCGTCTATGCCACCATGGTGGATCCGAAGAAGGGCATCAT  
CGCGGGGCTTGGGCCGCTACTGGTGGGGCTTGTGGTGGGGGCTAACATCC  
TCGCCGGCGGCCCGTTCTCGGGCGCGTCAATGAATCCGGCGAGGTCGTTC  
GGCCCGGCGTTGGCAGCCTGGAAGTGGACCGACCATTTGGATCTACTGGGT  
CGGACCGCTCGCCGGCGGTGGACTAGCTGGACTCGTCTACGAGCACCTGT  
TCATGGTCAGCACCCATGTTCTCTTCTTAGGGAGGACGAAGGCTTCTGA

## &gt;MaNIP2-3

ATGGCTTCCCACGGCACAAGGCCTACTACTACTGCCTGCAACGAAATCCA  
TGATGCGGTCACAACCTCACACCTCCATCTCTCCCTCTCTTCTCCACCGGA  
AGAGCCTCGAAGAACTCTTCCCACCCTTCCTTGCCGAGAAGGTCGTGCGG  
GAGACGATCGCCACCTTCCTGCTCGTGTTTCGTACCTGCGGGTCCGCGGC  
GTTGAGCAAGAGCGAGGCTGGCGCGGTGTCGCAGCTGGGGGCGTCGGTCG  
CCGGTGGGTTGATCGTCACGGTGATGATCTATGCCGTGGGCCACATCTCG  
GGGGCGCACATGAACCCCGCCGTACCTTGGCCTTCGCCGTCTCCCGGCA  
TTTCCCATGGATACAGGTTCCATTCTACATCTCTGCTCAGATCTCGGGGG  
CCATGGTCTCCTCCTTCGTCTCCGCGAGCTGCTGCACCCCATCACCGAT  
CTCGGTACCACGACGCCGTCCGACACAGCTCTGAAGGCCTTGGTCATGGA  
GATCGTGGTCACCTTCTGCATGATGTTTCGTACCTCGGCTGTAGCCACTG  
ATTCCAAAGCTGTAGGAGAGTTGGCAGGGTTAGCTGTTGGCTCGGCAGTC  
TGCATAACCTCCATTCTAGCTGGGCCGATCTCAGGAGGGTCGATGAACCC  
AGCGAGGACGTTAGGCCCGGCGTTGGCGAGCAGGAACCTACGATGCTCTAT  
GGGTGTATCTTCTTGGGCCTGTGGTCCGGCACATTGTTAGGGGCGTTCTCC  
TACAGCTTCATAAGGATGACTGAGAAGCAACCGCTGTCGACTACCACCCA  
GAAATTGTCCTCCTTCAAGCTTCGGCGTTTGCAGAGCCAGGACATGCCGA  
GTCCTTTAGCCGATGCTTCCGGGCGTGTTTAG

## &gt;MaTIP2-1

ATGGTGAAGCTCGCATTAGGAAGCTTGGGTGACTCCTTCAGCGTAGTGTC  
TCTCAAGTCCTATTTGGCCGAGTTCATTGCCACTCTCCTGTTCGTGTTTCG  
CTGGCGTCGGCTCCGCCATCGCTTATGGTAAGCTGACGGGTGGTGCAGCG

CTGGACCCGGCGGGCCTGGTCGCCGTGGCCCTCGCGCATGGCTTGGCCCT  
CTTCGTGCGGTGTCTCCATGGCAGCCAACATCTCCGGCGGCCACCTCAACC  
CGGCGGTACCTTCGGCCTCGCCGTGCGGTGGCCACATCACCATCCTCACC  
GGCATCTTCTACTGGGTGCCCCAGCTCCTCGGCTCCACCGTCGCTTGCCT  
CCTCCTCAAGTTCGTACCCGGCGGATTGGCTGTTCCGACTCACGGCGTGG  
CGGCCGGCATGAGCGAGCTGGAGGGGGTGGTGATGGAGGTGGTGATCACC  
TTCGCGCTGGTGTACACGGTGTACGCGACGGCGGGGACCCCAAGAAGGG  
GTCGCTGGGGACGGTGGCACCCATCGCGATCGGGTTCATCGTAGGGGCCA  
ACATCCTGGCGGGCCGGGCCATTACGCGGCGGTTCCATGAACCCGGCGCGC  
TCCTTCGGCCCCGCGGTGGCCAGCGGAGACTTCGCCGGCAACTGGGTCTA  
CTGGGTGGGGCCACTCATCGGCGGCGGACTGGCCGGGCTCATCTACGGTG  
ACATCTTCATCGGCTCCTACCAGCCCGTAGCAGCTCAGGACTATCCTTGA

>MaPIP2-3

ATGATCTTCATCCTCGTCTACTGCACCGCCGGCATCTCCGGTGGGCACAT  
CAACCCCGCGGTGACGTTTCGGGCTGTTCTTAGCGCGAAAGGTGTCGTTGG  
TGCGCGCCTTCCTCTACATAGTGGCGCAGTGCCTGGGTGCGATCTGTGGC  
GTCGGCCTCGTCAAGGGGTTCCAGAAGGCCTACTTCGTCCGCTACGGAGG  
CGGCGCCAACGAGCTCAGCGACGGCTACTCCAAGGGCACCGGCCTCGGCG  
CCGAGATCATCGGCACCTTCGTCTCGTCTACACCGTCTTCGCCGCGACC  
GACCCCAAGCGCAGTGCTCGCGACTCCCACGTCCCGGTTTTGGTCCCCT  
ACCGATTGGATTCGCGGTTTTTCATGGTCCACTTGGCGACGATCCCGATCA  
CGGGCACGGGCATCAACCCGGCGAGGAGTTTCGGAGCCCGCGTCATCTAC  
AACAAGGACAAGGCCTGGGATGACCAGTGGATCTTCTGGGTGGGGCCGGC  
CATCGGTGCTGCCATAGCTGCAGCTTACCACCAATACGTCCTGAGAGCGA  
GCGGTGTCAAGGCGTTGGGTTCCTTCAGAAGCAGTGCGTGA

>MaNIP2-4

ATGAAGTGCTTGAAACGATCAGAGATTTTCTCGCAGCCTGGAAGGACACA  
GGAAGACCACACCTTGAGGAGGAGTAGTTCTTGGAGATTGGAAATGGCTT  
CCCAAACAAGGCCTAACATCTCCAATGAGATCCATGACATAGATGTAGTC  
ACAGCTCAGAGCTCCGTCTCTCCCCGTCTTCTTACCACGAGAGCTTGAG  
AGAACTCTTCCCACCTTCCTTGCAAGAAAGGTCGTTGCTGAGATGATAT  
CCACCTTCTTGCTGGTGTTCGTGACCTGCGGTGCCGGCGCCTTGAACAAG  
AGCAACTCAGGCGTGGTGTGCGAGCTCGGCGCATCGGTCGCCGGAGGGTT  
GATCGTCACGGTGATGATCTATGCCGTGCGCCATATATCAGGGGCACACA  
TGAACCTGCCGTACCTTCGCCCTTCGCCGTCTCGAGGCATTTTCCATGG  
ATTAGGTGCCCTTCTACATGTGTGCTCAGATCTCGGGGGCCATGGTCGC  
CTCCTTCGTCTCCTCCGGGAGCTGTTGCACCCGATCACCAACCTCGGGACGA  
CGACGCCGTCTGACACGGCGGCGAAGGCATTGGTCATGGAAACCGTGGTC  
ACCTTCTGCATGATGTTTCGTACGTCGGCGGTAGCAACCGATACCAAAGC  
TGTAGGAGAGTTGGCAGGGTAGCTGTTGGTTCATCAGTGTGCATAACCT

CCATTCTAGCTGGGCCGGTCTCAGGAGGATCGATGAACCCCGCGAGGACA  
TTAGGACCGGCGGTTCGCGAGCAGGAATTACCAATCGCTCTGGGTGTATTT  
TGTTGGCCCCGGTGTCTGGGCACCGTCTCAGGCTCATTCTCCTACAGCTTCA  
TTAGAATGACTGAGAAGCAGCAGCATACTACTGCTGCACAGAAGCTGTCC  
TCCTTCAAGCTTCGACGCTTGCAGAGCCAGGAAATGGCGAGCCCCACAAG  
CAATGCTTTTCGAGAATGTGTAG

>MaPIP2-9

ATGATCTTCATCCTCGTCTACTGCACCGCCGGCATCTCCGGTGGGCACAT  
CAACCCCGCGGTGACGTTTGGGCTGTTCTTGGCGCGCAAGATTTGCTCG  
TCCGCGCCCTCCTCTACATGATCGCGCAGTGCCTGGGAGCCATCTGCGGC  
GTCGGGCTCGTCAAGGGATTCCAGTCCGCCTACTACGTCCGCTACGGTGG  
CGGCGCCAACGAGCTCAGCGACGGTTACTCCAAGGGCACCGGCCTGGCCG  
CCGAGATCATCGGCACCTTCGTCTCTGCTCTACACCGTCTTCTCTGCCACT  
GACCCCAAGCGCAATGCCCCGCGACTCCACGTCCCGGTTCTTGCTCCTCT  
TCCAATTGGGTTTCGAGTGTTCATGGTCCACTTGGCCACGATTCCGATCA  
CCGGCACCGGCATTAACCCGGCGAGGAGCTTCGGAGCGGCCGTCATCTAC  
AACAAGGACAAGGCCTGGGATGATCAGTGGATGTTCTGGGTGGGGCCGTT  
CATCGGCGCCGCTGTTGCTGCAGCCTACCACCAGTACATCCTTAGAGCCA  
GCGGCGCCAAGGCTTTGGGTTTCGTCTTCTCGATCTGA

>MaTIP3-2

ATGCCACCTCGCAGGTTTCGCCTTCGGTTCGCGCGGAAGATGCCGTTACCC  
GGACACCATGCGTGCGGCACTCTCCGAGTTCATCGCCACGGCTCTCTTTG  
TCTTCGCCGCCGAAGGCTCCGTTCTCTCCCTCGGAAAGCTATACAAGGAC  
ACCTCCACCGCCGGAGGGCTTGTGGTGGTGGCCATAGCCACGCTCTGGC  
TTTATCTGTCGCGGTCTCCGTCTCCTTGAACATTTCCGGCGGCCATGTCA  
ACCCTGCTGTACACTCGGCGCCCTTGTGCGGCGCCGGATCTCTCTCATA  
CTGGCGGTCTTCTACTGGGTGGCTCAGCTACTCGGCGCTGTCGTCGCCGC  
TCTCCTCCTCAGGCTGGCAACCGGTGGCATGAGGCCGCTGGGATTGCGGG  
TGGCGTCAGGCGTCAGCGAGGGGCACGCAGTCCTGCTGGAGATCGTAATG  
ACGTTGCGGCTCGTCTACACCGTGTACGCGACGGCGATCGATCCCAGGAG  
AGGCCATCTCGGCATCATCGCGCCTCTCGCCATCGGCTTCATCCTGGGCG  
CCAACATCCTTGCCGGCGGGCCATTCGACGGCGCCGCGATGAATCCCGCG  
CGGGCCTTCGGACCGGCAGTCGTCGGCTGGAGGTGGAAGAGCCACTGGGT  
GTACTGGGTGGCCCCCTTGGTAGGAGCAGCTCTTGCAGGGCTTATCTATG  
AGTTCCTTGATCCCGGATGAGACTCCCCGCACTCACCAGCCCTTGGCT  
CCCGAGGACTACTAA

>MaTIP2-4

ATGGCTGGAATCGCCTTCGGCCGCTTCGATGACTCTTTCAGTGTGCGGCTC  
ACTGAAGGCCTACCTCGCCGAGTTCATCTCCACTCTCCTCTTCGTCTTCG

CTGGCGTCGGATCAGCTATAGCTTACAACAAGTTGACGTCGAGCGCAGCT  
CTGGATCCTGCGGGGCTCGTCGCCATCGCCGTCTGCCATGGGTTTGCGCT  
CTTCGTGGCGGTATCGGTGGGCTTCAACATCTCCGGCGGCCACGTGAATC  
CGGCGGTACCTTCGGGTTGGCTCTTGGAGGGCAGATCACCATCCTCACT  
GGCATCTTATACTGGATCTCCCAGCTGCTTGGAGCTGTTGTCGGAGCTTT  
CCTCCTCAAGTTCTCGACCGGACTGGACACCCCCACTCATGGACTGGGAG  
CAGGAGTGGGAGCAGGAGAAGGGGTGGTGATGGAGATCATCATCACCTTC  
GCCCTGGTGTACACGGTGTACGCGACGGCAGCCGACCCGAAGAAGGGCTC  
CCTCGGCACCATCGCCCCGATCGCCATCGGCTTCATCGTCGGCGCCAACA  
TCCTCGCCGCCGGCCCCCTTCTCCGGCGGGTCGATGAACCCGGCTCGCTCC  
TTCGGGCCCCGCGTCGCTAGCGGGGACTTCTCCGACCTCTGGATCTACTT  
TGTCGGCCCCCTGATTGGCGGCGGCCTCGCAGGGTTGGTGACACCTACG  
CCTACTTGTTACACGACCACCAGCCACTTCCGCAGTGA

>MaPIP1-1

ATGATCTTTGCTTTGGTCTACTGCACTGCTGGCATCTCCGGTGGCCATAT  
CAACCCTGCTGTGACGTTTGGGCTGTTCTTGGCGCGGAAGCTGTCCCTCA  
CAAGGGCTGTCTTCTACATGGTGATGCAGTGCCTGGGTGCCGTCTGCGGA  
GCTGGTGTGGTGAAGGGGTTCAGAAGGGCGTCTATGAAAGCAACGGTGG  
CGGAGCCAACGTGGTGGCTCTGGCTACTCCAAGGGTGACGGCCTGGGTG  
CTGAGATTGTCGGCACCTTCATCCTTGCTACACAGTCTTCTCTGCTACC  
GACGCCAAGCGGAATGCCAGGGACTCCCATGTGCCTCTCCTTGCTCCCTT  
GCCTATTGGATTGTGCTGTTTTCTGGTTACCTGGCAACCATCCCCATCA  
CCGGCACTGGCATCAACCCAGCTCGGAGCCTGGGAGCTGCCATCATCTAC  
AACAAGGACCATGCCTGGGATGACCATTGGATCTTCTGGGTGGTCCCTT  
CATTGGAGCTGCCCTTGCTGCCATCTACCACCAGGTAGTCATCAGAGCCA  
TCCCCTTCAAGAACAGATCCTGA

>MaPIP1-4

ATGATCTTTGCTTTGGTCTACTGCACCGCCGGCATCTCCGGTGGCCATAT  
CAACCCTGCTGTGACCTTTGGGCTGTTCTTGGCGAGGAAGCTGTCCCTCA  
CACGGGCCATCTTCTACATGGTGATGCAGTGCCTGGGCGCCATCTGCGGT  
GCCGGCGTCGTCAAGGGGTTCAAAAGGGAGTCTACCAGAGCAACGGTGG  
CGGAGCCAACGTCGTGGCCTCCGGCTACTCCAAGGGCGACGGATTGGGCG  
CCGAGATCGTGGGCACCTTCATCCTGGTCTACACCGTCTTCTCCGCGACC  
GACGCCAAGCGCAACGCCAGGGACTCCCACGTGCCTATTCTTGCGCCCTT  
GCCCATCGGATTGCTGTCTTCTTGGTTACCTGGCAACCATCCCGATCA  
CCGGCACCGGCATCAACCCTGCTCGGAGCCTGGGAGCTGCCGTCATCTAC  
AACAAGGACCATGCCTGGGATGACCATTGGATCTTCTGGGTGCGTCCCTT  
CATTGGAGCTGCCCTCGCTGCCCTCTACCACCAGGTGGTCATCAGAGCCA  
TCCCATTCAAGAGCAGATCCTGA



## &gt;MaSIP2-2

ATGGGGCGGCTGGGGCTCGTGATGTGCGACGCGGCTATGTCGTTTCATGTG  
GGTGTGGGCCGGCGCGCTCGTCAAGCTCCTGGTCTACGACGCCCTCGGCC  
TGGGCCACCGCCCCGGCGGCGAGGCCCTCAAGATGGCCCTCGTTGTGCGG  
TACATGTTCTCTTCGCGTGGCTCGGCCACGTACGCGGGGTGGCGCCTA  
CAACCCTCTCACCGTGCTCTCCTACGCCTTCTCCGGTGGTCCCGAGGGGT  
TCCTTTTCACAGCCCTGGGAAGGATCCCTGCGCAGGTGATAGGATCAGCA  
ACTGGTGTAGATTTCATCAAACAAACCTTTCCTTCGATAGGCCATGGACC  
TCGTTTGAGCATTGATATCCATCGTGGGGCATGGACAGAAGGGTTCCTTA  
CGTTTATGATCGTGATGGCCTCACTAATGCTAAAGAAAAAAGATCCTGGA  
AGTTTCTTCATGAAAACATGGATTTCAAGCATTTTCAAGTTGGCACTTAA  
TGTCTTGTTCTGATTTAACTGGAGGAATTATGAACCCTGCCTCTGCCT  
TTGCTTGGGCATATGCTCGGGGAGATCACATAACGTTGGATCAACTAATT  
GTTTACTGGTTTGCGCCCATTCAGCAACTTTATTAGCAGTCTGGACATT  
CGGATTGCTTACCGAGCCAAAGAGCAAGGTGCAAAAAGCTGAAGAAAACA  
AGGTAAAGTCGGAGTGA

## &gt;MaPIP2-13

ATGATATTTGTCTCGTCTACTGCACCGCCGGCATCTCTGGTGGGCACAT  
AAACCCGGCCGTAACATTCGGCCTGTTTCTGGCGCGGAAGGTGTCGCTGC  
TGCGCGCGGTGTTCTACATGGTGGCGCAGTGCATGGGGGCCATATGCGGC  
GTCGGAATCGTGAAGGGCATCATGAAACACCAGTTCAACAGGTTTCGGCGG  
CGGGGCTAATGTGGTGGCTCCAGGCTACTCCAAGGGCACCGCGCTCGGCG  
CCGAGATCATCGGCACCTTCTTGCTCGTCTACACCGTCTTCGCCGCCACC  
GACCCCAAGCGCCGCGCTCGCGACTCCCACGTCCCGGTGTTGGCTCCTCT  
GCCCATCGGGTTTGCCGTGTTTCATGGTTCACTTGGCCACCATTCCCATAA  
CTGGCACGGGCATCAACCCCGCTAGGAGCTTCGGACCCGCCGTCATTTAC  
AACCGGCACAAGCCCTGGCATGATCACTGGATCTTCTGGGTGGGTCCGTT  
CGTCGGAGCACTGGCGGCGGAGGTATACCACCAGCACGTGTTGAGGGCGG  
CGAACGTCAAGACTTTGGGCTCGTTTCAGGAGCAGCCGGAGCAACTGTTAG

## &gt;MaTIP5-1

ATGTCAAGTAAACTCCTGTGCTTTTTTACTTCTGGAGTCAATTTTGGCT  
GTCTGCCGCATCTCTCCGTTCCCTATCTCGCCGAGTTCATCTCCACCTTCT  
TCTTCGTCTTCGCCGCCGTCGGCTCCGCCATCTCTGCCCGGATGTTAACG  
CCGGATGTCACGTTCGGACGCGTCGTCGCTGGTCGCGACGGCGCTCGCGCA  
GGGCTTCGCGCTGTTTCGCTGCGGTCTACATCGCCGCCGACATCTCGGGGG  
GCCACGTAAACCCCGCCGTACCTTCGGCCTCGCCGTCGCGGGGCACATC  
GGCGTCCCGACTGCCATCTTTTATTGGATCTCCCAGTTGGGTGGCTCCAT  
TCTCGCTTGCTCCTCCTCCGCGTCGCCTCGGCCGGACAGGCGATTCCGA  
CGACGGGGATAGGGACGGAGATGACGGGCTTCGGCGGGGCGGTGGTGGAG  
AGCGCGATCACGTTCAATTCTGGTGTACACGGTCTACGTGGCTGCGGACCC

CGGGGGCGGCGGCGGAGACGGAAAGAGGAAGAGGAAAATGAGGCGAGAGG  
 TGGCGGGGCCCCCTCGCGGTAGGTCTGACGGCAGGGGCGTGCCTCGGCG  
 GCCGCCTCCCTCACGGGGGGATCCATGAACCCGGCGAGGTCCTTCGGCCC  
 GGCCGTCGTCAGCGGCAACTTCAAGAACCACGCGGTCTACTGGGTGCGGC  
 CCCTCATCGGCGCAGCCCTGGCGGCGCTGGTTCACCAATACCTGGTGTTC  
 CCTCCGCTCCTCCGACGCCTATCCCAACTCCACGGTGTAG

>MaTIP2-2

ATGGCCGGCATCGCCTTTGGGCAATTTGACGACTCTTTCAGTGTGCGGCAC  
 ACTCAAAGCCTACCTCGCCGAGTTCATCTCCACTCTTCTCTTCGTCTTCG  
 CCGGCGTCGGATCAGCTATCGCTTACAACAAGCTGACGTCGAGCGCAGCT  
 TTGGATCCTGCCGGGCTGGTCGCGATCGCTGTTTGCCATGGTTTAGCGCT  
 CTTCGTGGCGGTGTTCGGTCGGCGCCAATATCTCCGGCGGCCACGTGAATC  
 CGGCGGTACCTTCGGGCTGGCTCTGGGAGGCCAGATTACCATCCTCACT  
 GGGATCTTCTACTGGGTGCGCGAGTTGCTTGGAGCTGTCGTTGGAGCTTT  
 TCTCGTCAAGTTCGCGACAGGACTGGACACCCCCACCCATGGCCTGGGAG  
 ACGGAGTGGGAGCAGGAGAGGCGGTGGTGATGGAGATCATCATCACCTTC  
 GCCCTCGTGTACACGGTGTACGCGACGGCGGCCGACCCGAAGAAGGGCTC  
 TCTCGGCACCATCGCCCCCATAGCCATCGGCTTCATCGTCGGCGCCAACA  
 TCCTCGCGGGCGGGCCCCCTTCTCCGGAGGGTCGATGAACCCGGCGCGCTCC  
 TTCGGGCCGGCGCTCGCCAGCGGGAAGTTCTCCGACCTCTGGATCTACTG  
 GGTCGGTCCCCTCATCGGTGGCGGCATCGCCGGGCTGGTGTACACCTACG  
 CCTACATGTGCTCAGACCACCAGCCACTCCCTCAGTGA

>MaPIP1-7

ATGATCTTTGCCCTCGTCTACTGCACCGCTGGGATCTCAGGTGGCCACAT  
 CAACCCGGCCGTGACCTTCGGGCTGCTCCTGGCGAGGAAGCTCTCCCTGA  
 ACCGAGCTCTCTTCTACATGGTGATGCAGTGCCTGGGTGCCATCTGCGGT  
 GCTGGTGTGGTGAAGGGGTTTCAGAAGGGGCTCTACCAGAGCAATGGTGG  
 CGGAGCAAACGTTGTGGCCGCTGGCTACACCAAGGGTGATGGCCTGGGTG  
 CTGAGATTGTTGGCACCTTCATCCTTGCTACACTGTCTTCTCTGCTACT  
 GATGCCAAGAGGAACGCTAGGGACTCTCATGTGCCTATCCTCGCCCCATT  
 ACCTATTGGTTTTGCCGTATTTCTTGTTTCATCTGGCCACCATCCCCATCA  
 CCGGCACTGGCATCAACCCTGCAAGAAGCTTTGGAGCTGCAGTTATCTAC  
 AACAAGGACCATGCTTGGGATGACCATTGGATCTTCTGGGTGGACCAT  
 CATCGGAGCTGCTCTTGCTGCCCTCTACCACCAGGTGGTGATCAGGGCAA  
 TCCCATTCAGAAGACAGGACCTGA

>MaPIP2-4

ATGATCTTTATTCTCGTCTACTGCACCGCCGGCATCTCCGGTGGGCACAT  
 CAACCCGGCGGTGACGCTGGGGCTATTCTTGCGCGCAAGGTCTCGCTGG  
 TCCGCGCCCTCCTCTACATGGTGGCGCAGTGCCTGGGAGCCATATGCGGA

GTCGGCCTCGTCAAGGGATTCCAAGAGGCCTACTTCGTCCGCTACGGTGG  
CGGCGCCAACGAGCTCAGCGCCGGCTACTCCAAGGGCACCGGCCTCGCCG  
CCGAGATCATCGGTACCTTCGTCTCGTCTACACCGTCTTCGCCGCCACC  
GATCCGAAGCGCAACGCCCGTGATTCCCACGTGCCGGTTTTGGCTCCTCT  
TCCAATTGGGTTCGCAGTTTTTCATGGTGCACCTTGGCCACGATCCCGATCA  
CCGGCACCGGCATCAACCCTGCGAGGAGCTTGGGAGCTGCCGTCATCTAC  
AACCAGGACAAGGCCTGGGATGACCAGTGGATCTTCTGGGTGGGGCCTTT  
CGTCGGTGCTGCCATTGCTGCAGCCTATCACCAGTACGTCCTGAGAGCGA  
GCGGTGCCAAAGCTATGGGGTCCTTCGGGAGCAATGCATGA

>MaTIP4-1

ATGAGAAAGATAACGTTAGGCAGCAGAAACGAGGCGGTTGAGCCGGACTT  
TGTCGGTTCGGTCTTCACCGAGCTGCTCCTCACCTTCCTCTTTGTCTTCG  
CCGGGGTCGGCGCCGTCATGACTGCAGAGGAGGTCGCAGGAGGCGAGGAC  
CGGATCATGTGGGTGGTGGCGGGCCCCGGCAGCAGCTCAGGCGATGCTGGT  
GGCGATGATTACAGCGGTTGGCCTCGATGTCTCGGCCGGCCACCTGAACC  
CCGCCGTCACCATCGGGTTTGCGGCCGGCGGCTACGTCACCGTCGTCCGC  
TGCGTCCTCTACGTGATCGCCCAGCTATTGGGCTCCTCCATGGCCTGCCT  
TCTCCTCAAGTACGTTGCTGCAGGACTGGATGTACTCCCAGTTCATGCAC  
TTGCTGCAGGAATGGATCCGCTCCAAGGCGTGATCATGGAGGCCGTCTTC  
ACCTTCTCCATGGTCTTCGCCATCTACGCCTTGATCATGGACCCCAAGAA  
GGGCGCAATCGCCGGCTCCGCTCCCCCTCCTCATCGGCCTCACCGTCGGCG  
CCAACTCCTTGGCCGGCGGGGCCTTCTCCGGCGCGTCGATGAACCCGGCG  
AGGTCATTCCGGGCCGGCGCTGGCCAACTGGGACTGGACCAATCACTGGGT  
GTATTGGCTGGGGCCCCCTCGTCGGAAGTGGCCTCGCAGGGTTCGCTCACC  
ACCACCTCTACGTCGCCGGGACGCATGGCGTTCTCCTTCCCAAAGATGAC  
GAAGTCGGCTTTTGA

>MaPIP2-12

ATGATCTTTGTCTCGTCTACTGCACCGCCGACATCTCTGGCGGGCACAT  
AAACCCGGCTGTGACGTTGGGTCTATTCTGGCGCGGAAGGTGTCGCTGC  
TGCGCGCAGTGCTGTACATGGTGGCGCAGTGCCTGGGCGCCATATGCGGC  
GTCCGGATCGTGAAGGCCATCATGAAGCAGCAATTCAACGCTTTCGGCGG  
CGGGGTAAATGTGGTGGCCCCAGGCCACTCCAAGGGCACCGCCCTCGGCA  
CCGAGATCGTCGGCACCTTCGTCTCGTCTACACCGTCTTCTCCGCCACT  
GACCCCAAACGCAGCGCCCGCGACTCTCACGTTCCGGTGTTGGCTCCTCT  
GTCGATCGGGTTTGCGGTGTTTCATGGTACACTTGGCGACGATTCCGATCA  
CGGGCACCGGCATCAACCCGGCAAGGAGCTTAGGAGCTGCGGTCAATTTTC  
AATCAGCACAAGCCGTGGCATGATCACTGGATCTTCTGGGTGGGTCTTTT  
CGGAGGAGCTCTGGCGGGCGGCGGTGTATTATCAGTACGTGTTGAGGGCGT  
CGACTATTAAGGATTTGGTCTCCTTCAGGAGCAGCCGCAGCAACTAA

## &gt;MaTIP4-2

ATGGCGAGGATAAAAGCTGGGAAGCAGAAAGGAGATGACCGACCCGGAGTT  
CGCTCGGTCCGTCTCACCGAGCTGCTCCTCACCTTCCTTTTCGTCTTCG  
TCGGCGTCGCTGCGTCCATGACCGCCGGGAAGATGGCAGGAGGGCAGGAC  
TCGATCATGGGACTGACGGCGGTGGCGGTGGCTCAGGCGATGCTGGTGGC  
GGTGATGGTAGCCGTCGGCCTCGACGTCTCGGCTGGGCACTTGAACCCCG  
CCGTCACGATCGGGTTTGCCGCCGGCGGCTACGTACCGTCTTCCGCTGC  
GTCCTCTACGTGATCGTCCAGCTGCTGGGCTCTTCCATGGCGTGCCTCCT  
CCTCCAGTACATCGCTGGAGGGCAGGCCGTCCCAGTTCACGCGCTCGGTG  
TGGGCATAGGGCCCCCTTCAAGGTGCGATCATGGAGGTCGTCCTCACCTTC  
TCCATGGTCTTCTCCATCTACGCCATCATCGTAGACCCCAAGAAGGGCAT  
CGTGTCGGTGCTGGCGCCGCTGCTCATTGGTCTCATCGTGGGGGCCAACA  
CGCTCGCCGGCGGGGCCCTTCTCGGGGGCTTCCATGAACCCGGCGAGGTCC  
TTCGGGCCCCGCCCTGGCCACCTGGGACTGGACCAATCACTGGGTGTACTG  
GGCGGGGGCCCTTCGTGGGGAGTGGCCTCGCGGGGTTCGTCTACGACCACC  
TCTATCTCATGCGGCCTCGTGACGACCTCCCTGGGGATGAAGAAAGCATC  
ACCAAGCCACTCTGTTAG

## &gt;MaSIP2-1

ATGCTTGACCAGAAAGAGTTTGTAAATAAAAAGGAAACAGATGTAGAAGA  
AGAGAAGGAACACAGCAACCAAGCGTCTCGGGTTAAGCTCATTGTCTCCG  
ACTCCTTCCTCTCCTTCATGTGGGTGCTGTCAGGATCCGTTATTAGGTAT  
TTGATTTACATGATTCTAGGGACTGGAATGGACCCAATTTCTGTTCTATT  
AAAAGGATATTTGGCCCTGGTGTACCTCTACTACTTCTCACAGCTTCGAA  
AGGTGACCAATGGTGGAACATATAACCCTCTCTTTGTCCTCTGCCATGCC  
ATATCTGATAATTTTGTGAGTTTCTTTATGCAGTGTTTGGAAGGATTCC  
TGCTCAGGTTCTTGGATCTGTCATTGGGGTTTGGTTAATTAATGCAACCT  
TCCCTGCAGCGGCTAATGGACCTCGTTTGAATGTTGATGTTAGTTATGGA  
GCATTGATTGAAGGACTCATTACATTTGCGATTATCATTGTCTCTCTAGG  
GCTAAACAAATTCCCAAGATCTTCCCATAGACATGGATATCAAGTTTTG  
CCAAACTTGCACTTCACGTCCTTGCTTCTGACATCACCGGTGGAGTTATG  
AACCCTGCTTCTGCCTTTGGATGGGCATATGCTCAAGGGAAGCATCTAAC  
GAAGGAGCATTTGTGTGTGTACTGGCTTGACCTCTGGAGGCAACTTTAT  
TGTTGTATGGATTTGCAGCTTGTTCAATTAAGCTGCCGAAGCGAAAGAGG  
CAGCATGAGATGCAATACAAGGATAAACTAGTTTGA

## &gt;MaPIP1-5

ATGGGCGTGGTCAAGTCCGACACCAAGTGCTCCACGGTGGGCATCCAAGG  
CATCGCCTGGGCCTTCGGTGGCATGATCTTCGCCTTGGTCTACTGTACCG  
CTGGGATCTCAGGTGGACATATCAACCCGGCGGTGACCTTCGGGCTGTTT  
CTGGCAAGGAAGCTCTCCCTCACCAGGGCGCTGTTCTACATGGTGATGCA  
GTGCCTGGGTGCCATCTGCGGTGCTGGTGTGGTGAAGGGGTTTCGGAAGG



GGCTCTACGAGAGCAACGGCGGTGGAGCAAACGTGGTGGCCGCTGGCTAC  
 ACCAAGGGTGATGGCTTGGGTGCTGAGATTGTGGGCACCTTCATTCTTGT  
 CTACACCGTCTTCTCTGCCACCGATGCCAAGAGGAATGCTAGGGACTCTC  
 ATGTGCCCATACTCGCCCCCTTGCCATTGGTTTTGCAGTTTTCTGGTT  
 CACTTGGCCACCATCCCCATTACCGGCACTGGCATCAATCCCGCAAGAAG  
 CCTTGGAGCTGCCGTCATCTACAATAAAGACCATGCTTGGGATGACCACT  
 GGATCTTCTGGGTTGGACCATTATCGGAGCTGCTCTTGCTGCCATGTAC  
 CACCAGGTTGTGATCAGGGCAATCCCATTCAAGAGCAGGCCCTGA

>MaTIP1-6

ATGCCGATCCCTCGAATCGCCGTTGGAACCTCAGGAGGAGGCGACTCACCC  
 GGGCACGCTCAAGGCCGCCCTCGCCGAGTTCATCTCCACCCTCATCTTCG  
 TTTTCGCTGGCCAAGGCTCCGGCATGGCCTTTAGCAAGCTGACGGGCGGC  
 GCAGCCACCACTCCGGCCGGCCTCATAGCGGCAGCCCTAGCGCACGCCTT  
 CGCCCTATTCTGTGGCCGTGTCCGTGGGCGCCAACATCTCTGGTGGCCACG  
 TGAATCCGGCCGTAACCTTCGGCGTCTTCATCGGCGGCAACATCACCTC  
 CTCCGCAGCATCATATACTGGATCGCACAGCTCCTCGGCTCCACCGTCGC  
 GTGCCTCCTGCTCCGCTACTCCACCGGCGGCCTGTCCACGGGCAGCTTCG  
 CTCTCTCCGGCGTCAAGCGTGTGGGAGGCGCTCGTGCTGGAGATCGTCATG  
 ACCTTCGGCCTCGTGTACACCGTGTACGCGACGGCGGTGGACCCCAAGAA  
 GGGTAGCCTGGGCACCAATTGCGCCCATCGCCATCGGCTTCATCGTGGGCG  
 CCAACATCCTGGCCGGCGGGGCCTTCGACGGCGCGTCCATGAACCCGGCC  
 GTGTCCTTCGGCCCCGCCCTGGTGAGCTGGTCCTGGGACGACCACTGGGT  
 CTACTGGGCCGGACCCCTCATCGGCGGCGGCCTCGCCGGTCTCGTCTACG  
 AGTTTTTCTTCATCTCCCACACTCACGAGCAACTCTCCTCCGCGACTAC  
 TGA

>MaPIP2-5

ATGATATTCATCCTCGTCTACTGCACCGCCGGCATCTCCGGTGGCCACAT  
 AAACCCGGCGGTGACGTTTGGGCTGTTCTTGGCACGAAAGGTCTCCCTCA  
 TCCGCGCGTCTCTACATGATCGGCCAGTGCTTGGGAGCGATCTGTGGG  
 GTTGGGCTGGTGAAGGATTCCAGAAGGCCTTCTTCGTCCGCTACGGCGG  
 CGGCGCCAACGAGCTCAGCGACGGCTACTCCAAGGGCACCGGCCTTGCCG  
 CAGAGATCATCGGCACCTTCGTCTCTGCTACACCGTATTCTCCGCCACC  
 GACCCCAAGCGCAGCGCCCGCGACTCCCATGTGCCGTTCTGGCGCCACT  
 CCCGATCGGGTTCGCAGTTTTTCATGGTTCACCTCGCCACGATTCCCATCA  
 CCGGCACTGGCATCAACCCGGCGAGGAGCTTTGGAGCTGCTGTCATCTAC  
 AACAAGGACAAGGCTTGGGACGACCAAGTGGATATTCTGGGTGGGGCCTCT  
 CATCGGTGCCGCCATTGCCGCAGCTTATCACCAATACATCCTAAGAGCCG  
 GAGCTGTCAAAGCTTTGGGTTCTTTCCGGAGCAATGCATGA

>MaNIP2-2

ATGGCTTCCTCCACAAGGCCTAATAGCTCCAATGAAATCCATGACATCGA  
 TGTAGTTACAGCTCAGAACTCCTACATCTCTCCGACTCTTCTTACCAGA  
 AGAGCCTTAAAGAAGTCTTCCCACCCTTTCTTGCAAGAAAGGTTGTAGCT  
 GAGACGATCGCTACCTTTTTACTGGTATTCGCCACCTGCGGCTCCGCCGC  
 GTTGAGCAAGAGCAACCCAGGCCTGGTCTCGCAGCTCGGGGCATCAGTCG  
 CCGGAGGACTGATCGTGACGGTGATGATTTACGCCGTGGGGCACATCTCG  
 GGCGCCACATGAACCCTGCCGTCACGTTGGCCTTCGCCGTCGCCAGGCA  
 TTTTCCATGGATTCAGGTCCCCTTTTACATGGCTGCTCAGATCTCCGGCG  
 CCATGATCGCTTCCTTCGTCTCCGCGAGCTGCTGCACCCGATCACCGAT  
 CTCGGGACCACGGCGCCGTCGGATACGGCGGTGAAGGCACTGGTCATGGA  
 AATCGTGGTGACCTTCTGCATGATGTTTCGTCACGTCAGCGGTGGCGACGG  
 ACACCAAAGCTGTAGGAGAGTTGGCAGGGTTAGCTGTGGGTTTCATCGGTG  
 TGCATAACCTCCATTCTAGCTGGGCCGATATCTGGAGGATCGATGAACCC  
 GGCGAGGACACTCGGACCGGCCGTCGCGAGCAGCAATTACGACTCGCTTT  
 GGGTGTATTTTCTGGGCCCCGGTGTGGGCACCTTGTGAGGAGCATGCTCC  
 TACAGTTTCATAAGGATGACCGAGACGCAACCACAAGCCACTGCTGCACA  
 GAAGCTATCCTCCTTCAAGCTCCGCCGCTTGCAGAGCCTGGAAATGGCGA  
 GTCCTACCAACAACGCTTTCGATAACATTTAG

>MaTIP1-4

ATGCCGATCCTTCGCATAACGATCGGAACGCCAGAGGAGGCGCGCCACCC  
 TACCGCGCTTAAAGCCGCTCTCGCCGAGTTCATCTCCGTGCTCATTTTCG  
 TCTTCGCCGGCCAGGGATCGGGGATGGCGTTCAATAAGCTCACGGATGAT  
 GGCTCCACAACCCCAGCGGGGTTGGTGTGCGCGTCCTTGGCCCATGGCTT  
 CGGCCTCTACGTGCGAGTAGCCGTCGGGGCCAACATCTCCGGCGGCCACG  
 TCAACCCGGCCGTCACCTTCGGCGCCTTCCTCGGTGGCAACATCACGCTG  
 CTTCGGGGCATTTTGTACTGGATCGCGCAGCTGCTCGGCTCCGTGGTCGC  
 CTGCCTGCTTCTCAAGTTCGCCACCGCGGCCTGGAAACAACGCCCTTCT  
 CGCTGTGAGCAGCGTGACCGTGTGGAACGCGTTGGTGTGAGATCGTG  
 ATGACCTTCGGGCTGGTGTACACGGTCTACGCGACGGCCATAGATCCGAA  
 GAAGGGCAACCTGGGAATCATCGCGCCCCCTCGCGATCGGGCTCGTCGTGG  
 GTGCCAACATCCTGGCAGGCGGGGCGTTCGACGGCGCCTCCATGAACCCG  
 GCCGTCTCCTTCGGCCCCGCGGTGGTCAGCTGGACCTGGGACAATCACTG  
 GGTATACTGGGTCGGCCCCGTTGCTCGGCGGGGGCATCGCGGCCTTGGTCT  
 ACGACGGCGTCTTCATCGGCTTCGGCACCCATGAGCAGCTCCCTACCACA  
 GACTACTAG

>MaPIP2-10

ATGATCTTCATCCTCGTCTACTGCACCGCCGGCATCTCTGGAGGGCACAT  
 CAACCCCGCGGTACGCTCGGGCTGTTCTTGCGCGGAAGGTGTCGCTGA  
 TACGGGCGTTGCTGTACATGGTGGCGCAGTGCTTGGGAGCCATCGTCGGG  
 GTGGGGATCGTGAAGGGGATCATGAAGCACCAGTATAACTCCCTCGGCGG

CGGAGCCAACATGGTCGCCGCCGGCTACTCCAAGGGTACCGCCCTCGGGG  
 CCGAGATCATCGGCACCTTCGTCTCGTCTACACCGTCTTCTCTGCCACC  
 GACCCCAAGCGCAGCGCTCGCGACTCGCACGTCCCCGTGTTGGCACCCT  
 CCCCATCGGGTTCGCCGTGTTTCATGGTGCACCTCGCCACTATCCCCATCA  
 CCGGGACCGGCATCAACCCTGCTCGGAGCCTTGGCGCTGCAGTCATCTAC  
 AACCAGGACAAGCCCTGGGATGACCATTTGGATCTTCTGGGTGGGTCCCTT  
 CGTCGGAGCGTTAGCCGCGGCGGCGTACCACCAGTACATCCTGAGAGCAG  
 CGGCCATCAAGGCTCTGGGTTCCTTCAGGAGCAACCCACCAACTAA

>MaNIP3-2

ATGCATCAATATCTAATTCAGCAAATATTGACCAAAAATACACTGAAACC  
 GAAGCCTTTGGCAATGCCGGAGCCGGAGACGCCGAACGTGTCAGCCCCGG  
 CGACGCCGGGCACGCCGGGCGCGCCGCTCTTCAACTCGCTCCGAGTTGAC  
 TCGCTGTCTTACGACCGGAAGTCGATGCCGAGGTGCAACAGGTGCCTCCC  
 GTTGGAGTCGTGGGCCTCCTCCCCCACACGTGCTTCATCGAGCTCCCCA  
 AGCCCCAGCTCTCCCTACCCGCAAGCTGGGAGCAGAATTTGTGGGGACA  
 TTCATCCTCATATTTGGCGCCACGGCGGCACCGATCGTGAACCAGAAGTA  
 CAACGGCGCCGAGACCCTCATCGGCAACGCCGCCTGCGCCGGCCTGGCGG  
 TCATGATCGTCATCCTGTCCACAGGCCACATTTCCGGCGCCACCTCAAC  
 CCGTCCCTCACCATCGCTTCGCGATGCTGCGCCACTTCCCCTGGGCCCA  
 CGTCCCCGCCTACATCCTCGCCCAGGTCTCCGCCTCCATCTGCGCCTCCT  
 TCGCCCTCAAGGCCGTCTTCCACCCCTTCTCTCCGGCGGCGTCACCGTG  
 CCCTCCGTCAGCTCCCCCAGGCCTTCTTCATCGAGTTCCTCATCACCTT  
 CAACCTCCTCTTCGTGCTACCGCCGTCGCCACCGACACTCGTGCCGTGG  
 GGGAATTGGCTGGAATCGCGGTGGGGGCCACGGTCATGCTCAACATTCTG  
 GTGGCCGGGCCATCGAGCGGGGGATCGATGAACCCGGTTCGGACGCTTGG  
 GCCGGCGGTAGCGGCCGGCAATTACGAGCGGATTTGGATATATCTGGTGG  
 CGCCGACGGCCGGGGCAGTCACGGGAGCCCGCTTTACACGGCCGTCAAG  
 CTCAAGGAGGAGGACGGCGAGATGCCACGGCAACAACCTTCTGGAAGATTA  
 TCCACGTCATACTAGATATGCTTTGCAAAATGATTCTTGGATTGTGGCCT  
 CTATATTTTATCTTTGTCTGTAAACATAATTTTTTTTATTGCAGATG  
 TTGAATTGTGAATATTGTAAGCTACGATAG

>MaTIP3-1

ATGCCGCCCCGCAGGTTCGCCTTCGGCCGCACCGACGATGCCGTCCACCC  
 GGATACCATGCGTGCCGCTCTCTCGGAGTTCATCGCCACCGCTCTCTTCG  
 TCTTCGCCGCCGAGGGCTCCATTCTCTCTCTCGGAAAGCTCTACAAGGAC  
 ACCTCCACCGCAGGGGGGCTGGTGGTGGTGGCTATAGCCACGCGCTAGC  
 TTTGGCTGTAGCCGTGGCCATCGCCTTTAACATATCGGGTGGCCACGTCA  
 ATCCTGCGGTACGCTCGGCGCTCTCGTCGGCGGCCGGATCTCCCTTGTG  
 CGGGCGGTATTCTACTGGGTGGCGCAGCTACTCGGCGCCGTCGTAGCCGC  
 CCTCCTCCTCAGGCTCGCGACCGGTGGCATGAGGCCGGTTGGATTCTCGG

TGGCGTCGGGCGTCAGTGATTGGCACGCCGTCCTGCTGGAGATAGTGATG  
ACGTTCTGGGCTGGTCTACACCGTCTACGCGACTGCGATCGACCCCAAGAG  
GGGGCACCTCGGCACCATCGCGCCTCTGGCCATTGGCTTCATCCTGGGCG  
CCAACATCCTTGCCGGGGGACCGTTCGACGGCGCGGCAATGAACCCGGCG  
AGGGCCTTCGGACCGGCACTTATCGGGTGGAGGTGGAAGCACCACTGGGT  
GTACTGGGTGGCCCCCTTCATAGGTGCAGCACTTGCAGGCGTTATGTATG  
AGTTCCTTATGATCCCAGCTGAGGCTCCTCGCACTCACCAGCCTTTGGCT  
CCTGAGGACTATTAG

>MaPIP1-6

ATGGGGGTGGTCAAGTCCAGCACCAAGTGCTCGACGGTGGGCATCCAGGG  
CATCGCCTGGGCCTTTGGCGGCATGATCTTTGCGCTGGTCTATTGCACCG  
CTGGGATCTCAGGTGGCCATATCAACCCGGCGGTGACCTTCGGGTTGTTC  
CTGGCGAGGAAGCTCTCCCTCACCAGGGCTCTGTTCTACATGGTGATGCA  
GTGCCTGGGTGCCATCTGCGGGGCTGGTGTGGTCAAGGGGTTCAAAAGG  
GGCTCTATGAGAACAACGGTGGTGGGGCAAACGTGGTGGCTCCTGGCTAC  
ACCAAGGGCGATGGCTTGGGTGCTGAGATCGTGGGCACCTTCATCCTCGT  
CTACACTGTCTTCTCTGCCACTGATGCCAAGAGGAGTGCTCGGGACTCTC  
ATGTGCCTATCCTTGCTCCGCTGCCTATTGGCTTTGCAGTGTTCTGGTT  
CACCTGGCTACCATCCCCATCACTGGCACTGGTATCAATCCTGCCAGGAG  
TCTTGAGCTGCAATCATCTACAACAAGGGCCATGCTTGGGATGACCATT  
GGATATTCTGGGTGGGCCATTCAATTGGAGCTGCTCTTGCTGCCTTGTA  
CACCAGGTAGTCATCAGGGCAATCCCATTCAAGAGCAGGTCATGA

>MaTIP1-3

ATGCCGATCACTCAGATAGCCATCGGGACTACGGCCGAGGCAACCCACCC  
GACTGCACTCAAGGCCGCGCTCGCCGAGTTCATATGCACCTTCATCTTCG  
TCTTCGCCGGCCAAGGCTCCGGCATGGCCTACAACAAGTTGACGAGCGAC  
GGGGCTGCGACGCCCCGAGGGGCTGATCGCGGCGGCGCTGGCGCACGGCTT  
CGCCCTGTTTGTGGCGGTGTCCGTGGGAGCTAACATCTCGGGTGGGCACG  
TGAACCCGGCCGTGACCTTCGGCGCCTTCGTGGGCGGCAACATCACGCTG  
CTACGAGGCATCCTCTACTGGATCGCCAGCTGCTGGGCTCCACCGTGGC  
CTGCCTCCTGCTCCGCTTCTCCACCGGCGGGCTCGAGACCGGCACCTTCG  
GGCTGACCGGGGTGAGCGTGTGGGAGGCGCTCGTGCTGGAGATCGTCATG  
ACCTTCGGCCTCGTGTACACCGTCTACGCCACCGCCGTGGACCCCAAGAA  
GGGAAGTCTCGGCACCATCGCCCCATCGCCATCGGCTTCATCGTCGGCG  
CCAATATCCTTGTGGGCGGGCCCTTCGATGGCGCCTCCATGAACCCCGCC  
GTGTCCTTCGGCCCCGGCTCTCGTCAGCTGGTCGTGGACCCACCAGTGGGT  
GTACTGGCTCGGACCACTCATCGGCGGCGCTCTTGCCGGTATCGTCTACG  
AGATCTTCTTCATCAGCCACTCCCACGAGCAGCTCCCCACCGCCGATTAC  
TGA



>MaTIP1-5

ATGCCGATCTCTCGGATCGCCATCGGGACGACGGAGGAGGCGACGCACCC  
GAGCGCGCTGAAAGCCGCGCTCGCCGAGTTTATATGCACCTTCATCTTTG  
TCTTCGCCGGCCAAGGCTCCGGCATGGCCTACAGCAAGATGACGAGCGGT  
GGGGCGGCGACGCCCACAGGACTGATCATGGCGGCGCTGGCGCACGCCTT  
CGCCCTGTTCTGTGGCGGTGTTCGGTGGGGGCGAACATCTCGGGCGGGCACG  
TAAACCCGGCCGTGACCTTCGGTGCGTTCGTGGGCGGCAACATCACGCTG  
CTGCGAGGCGTTCTCTACTGGGTGGCGCAGCTGCTCGGCTCCACCGCGGC  
CTGCCTCCTGCTCCACTTCGCCACCGGCGGGCTGGAGACCGGCACCTTCG  
GGCTGTCTCGTGGGGGTGGGCGTGTGGGAGGCGCTGGTGCTGGAGGCCGTC  
ATGACCTTCGGCCTTGTGTACACCGTCTACGCCACCGCCGTCGACCCCAG  
GAGGGGTAGCCTCGGCGCCATCGCCCCATCGCCATCGGCTTCATCGTTG  
GCGCCAACATCCTGGTGGGCGGCGCCTTCGATGGTGCTCCATGAACCCG  
GCCGTGTCTTCGGTCCCGCGCTCGTCAGCTGGTCTGGACCCACCAGTG  
GGTGTACTGGCTGGGCCCCGCTCAGCGGTGGCGCCCTCGCCGGCCTCGTCT  
ACGAGATCTTCTTCATCTGCAGCACCCACGAGCAGCTCGCCTCCGCCGAC  
TACTGA

>MaNIP2-1

ATGGCTTCTTCCCATGTAAGGCCTAACAACTCCAACGAAATCCATGACAT  
AGACGTCGTCACAGCTCAAACGTTGACCACCCCAAGCTTCTTCGACCCCC  
CCAGAGTCCATCGTCGGAGAAATTTGAAGGAACTCTTTCCACCATTTCTT  
CCCAGAAAGGTTGTGTCTGAGATGATAGCTACATTTTACTTGTGTTCGT  
GACCTGCGGAGCTGGTGCGTTAAACAAGAACAACCCGGGCGTGGTGTCGC  
AATTAGGGCAATCGGTCGCCGGTGGCTTGATCGTCACTGTGATGATCTAT  
GCGGTTGGCCATATTTCCGGGGCGCACATGAACCCCGCAGTCACGTTAGC  
CTTCGCCGTGGCCCCGGCATTTCCTCATGGATACAGGTGCCCTTCTATATGT  
TAGCTCAGATAGCAGGGTCTACGACCGCCTCGTACATCCTACGTGAGCTG  
CTCGATCCCATTTCATGATCTAGGGACGACGACGCCGTCTCACACTGCCGC  
GAAAGCCTTGGTGGCGGAGATCGTAGTGACCTTTAACATGATGTTTCGTGA  
CCGCGGCGGTAGCGACGGACACAAAAGCCGTAGGAGAGTTAGCAGGCCTC  
GCAGTTGGCTCAGCAGTTTGCATCACCTCCATCTTAGCGGGGCCCATCTC  
GGGAGGGTCAATGAATCCAGCAAGGACGCTGGGACCGGCGTTGGCAAGCA  
ACAAGTTTGA CTCGTGTGGGTGTACTTCGTTGGCCCCGCCGTGGGCACA  
GTAGCAGGGGCTTTGGCCTACAGCTTTATACGACTAGATGAGCACTCGTT  
ATCGTCACAGAAGGACAGCCAGAAGTCACCCTCCCTCAAGATGCGTCGCG  
TGCAGAGCCAGGACATGGCGAGTCCCACTAATGATGCTTTTGAATCCGGC  
GTTTAG

>MaPIP2-6

ATGTCGAAGGAGGTGAGCGTGGAGGTGGAGCAGCCACCGGCGAAGGACTA  
CAGTGACCCGCCGCCGGCGCCGCTGCTGGACTTTGGTGAGGTCCGCCTCT

GGTCTTTCTACCGAGCCCTCATCGCCGAGTTCGTCGCCACCCTGCTCTTC  
CTCTACGTCAGCATCGCCACCGTCATCGGCCACAAGGAGCAGAACGCGGC  
CGACCAGTGCAGCGGCGTAGGCCTCCTCGGCATCGCTTGGGCCTTCGGCG  
GCATGATCTTCATCCTCGTCTACTGCACCGCCGGAATCTCAGGAGGACAC  
ATCAACCCGGCGGTGACGTTTCGGGCTGTTCTAGCGAGGAAGGTGTCGCT  
GATAAGGGCGGTGCTGTATATTGTGGCTCAGTGCTTGGGAGGCATCGTCG  
GGGTGGGCATCGTGAAAGGGATCATGAAACACCAGTACAACCTCCCTCGGC  
GGCGGGGGCCAACGTGGTCGCAACCGGCTACTCCAAGGGCACCGCCCTCGG  
GGCGGAGATCATCGGCACCTTCGTCTCTACACAGTCTTCTCCGCCA  
CCGACCCCAAGCGCAGCGCCCGCGACTCTCACGTCCCCGTGTTGGCACCA  
CTTCCCATCGGGTTCGCCGTGTTTCATGGTACACCTCGCCACCATTCCCAT  
CACCGGGACTGGCATCAACCCCGCTCGGAGCCTTGGCGCCGCAGTCATCT  
ACAACCAGGACAAGGCCTGGGATGATCATTGGATCTTCTGGGTGGGTCCG  
TTCATCGGAGCGTTGGCCGCCGCGGCGTACCACCAGTACATCCTGAGAGC  
AGCCGCCATCAAGGCTCTGGGCTCCTTCAGGAGCAACCCGAGCAACTAA

>MaPIP1-2

ATGATCTTTGCCTTGGTCTACTGTACCGCCGGGATCTCTGGTGGCCACAT  
CAACCCCGCGGTGACCTTCGGGCTGTTCTGGCGAGGAAGCTGTCGCTGA  
CCAGGGCTCTGTTCTACATGGTGATGCAGTGCCTGGGCGCCATCTGCGGT  
GCCGCTGTGGTCAAGGGGTACCAGAAGGGGCTCTATGAGAGCAACGGTGG  
CGGAGCTAACGTCGTGGCTCCTGGCTACACCAAGGGTGATGGCCTGGGTG  
CTGAGATCGTCGGCACCTTCATCCTCGTCTACACTGTTTTCTCTGCTACT  
GACGCCAAAAGAAACGCCAGGGACTCTCATGTTCCCATTTTGGCTCCCCT  
CCCCATTGGGTTTGCCGTGTTCTTGTCCACCTGGCTACCATCCCCATCA  
CCGGCACCGGCATCAACCCTGCCAGAAGCCTTGGCGCTGCCATCATCTAC  
AACAAGAAGCATGCCTGGGATGATCATTGGATCTTTTGGGTGGACCCTT  
CATTGGAGCTGCTCTTGCTGCCATCTACCACCAGATAGTCATCAGGGCGA  
TCCCATTCAGAGCAGGCCCTGA

>MaPIP2-11

ATGATCTTTATCCTCGTTTACTGCACCGCCGGCATCTCTGGTGGACACAT  
AAACCCGGCCGTCACGTTGGGTCTGTTCTGGCGCGGAAGGTGTCGCTGC  
TTCGCGCGGTGATGTACATGGTGGCGCAGTGCTTGGGGGCCATATGCGGC  
GTCGGGATCGTGAAGGGCATCATGAAGCACCAATTCAACGCCTTCGGCGG  
CGGGGCAAACCTCTGTAGCCGCAGGATACTCCAAAGGCACCGCGTTCGGCG  
CCGAGAGCATCGGCACCTTCGTGCTCGTCTACACCGTCCTCTCCGCCACC  
GACCCCAAGCGCAGCGCCCGCGACTCCCACGTCCCGGTGTTGGCTCCGCT  
GCCCATTTGGGTTCGCTGTGTTTCATGGTTCACCTTGCCACCATTCCCATAA  
CTGGCACGGGCATCAATCCGGCGAGGAGCTTCGGAGCCGCGGTCATTTAC  
AACCAGCACAAACCCTGGCATGACCACTGGATCTTCTGGGTGGGTCTTTT  
CGTCGGAGCTCTGGCGGCGGCGGTGTACCACCAGTACGTGCTGAGGGCGG

CGGCACTGAAAGCTTTGGGCTCGTTCAGGAGCAGCCGCAGCAACTAA

>MaPIP1-8

ATGATCTTTGCTCTGGTCTACTGCACTGCCGGCATCTCTGGTGGCCACAT  
CAACCCGGCTGTGACCTTTGGGTGCTACTGGCGAGGAAGCTCTCCCTGA  
CCAGGGCCATCTTCTACGTGGTGATGCAGTGCCTGGGCGCGATTTGCGGC  
GCCGGTGTGGTGAAGGGGTTTCAGAAGGGGGTGTACGAGAGCAACGGTGG  
CGGAGCCAACGTCGTGGCCGCTGGCTACACCAAGGGCGATGGCCTTGGCG  
CGGAGATCGTCGGCACCTTCATCCTTGTCTACACAGTCTTCTCCGCCACT  
GATGCCAAGAGGAGTGCAAGGGACTCTCATGTGCCTGTGCTTGACCCCTT  
GCCTATTGGATTTGCGGTTTTCTGCTTACCTGGCCACCATCCCCATCA  
CTGGCACTGGCATCAACCCTGCCAGGAGCCTCGGAGCTGCCATCATCTAC  
AACAAAGAACACGCCTGGAATGACCATTTGGATCTTCTGGGTGGTCCCCT  
CATTGGAGCTGCCTTGGCTGCCATCTACCATCAGGTGGTGATCAGAGCCA  
TCCCGTTCAGGAGCAAGCGTTGA

>MaTIP1-2

ATGCCGATCGGTAGCATAGCAATCGGAGCGCCCGGCGAGGCGAGCCATCC  
CGACACGATCAAAGCCTCCCTCGCGGAGTTCATCTCCACGCTCATATTCTG  
TCTTCGCCGGCGAGGGCTCCGGGATGGCTTTCAATAAGCTAACAAATGAC  
GGCTCCACGACGCCAGCAGGCCTGGTGGCGGCGTCCTTGGCCACGGCTT  
CGCCCTCTTCGTGGCGGTATCAGTCGGGGCTAACATCTCCGGTGGTCACG  
TCAACCCGGCCGTCACCTTCGGGGCCTTCCTCGGCGGCAACATCTCTCTG  
ATTCGCGGGATCCTCTACTGGATCGCGCAGCTGCTCGGATCCGTCGTCGC  
CTGCCTGCTTCTCAAGCTCGCCACCGGTGGACTGGAGACGTCGGCCTTCT  
CGCTGTGTCGTCGGACGTGAGCGTGTGGAACGCCGTGGTGTTCGAGATCGTC  
ATGACCTTTGGGCTGGTGTACACGGTGTACGCGACGGCGGTGGATCCGAG  
GAAGGGCGACCTGGGAGTCATCGCGCCCATCGCCATCGGGTTCATCGTCG  
GCGCCAACATCTTGGCGGGCGGGGCGTTTCGACGGCGCGTCCATGAACCCG  
GCGGTCTCATTCGGCCCCGGCGGTGGTCAGCTGGACCTGGGACAACCACTG  
GGTGTACTGGGTGCGCCCCGTTGATCGGGGCGGCCATCGCAGCTTTGGTCT  
ACGACGGCGTCTTCATCGGCCAGGCGACCCACGAGCAGCTTCCCCCTCA  
GATTACTAG

>MaNIP4-1

ATGGTCTACTCTGTGCGCCACATCTCCGGTGCTCATTTTAATCCTGCGGT  
CACCACCACGTTACCATTTCTCAAGCAGTTCCTCTCAAGCAGCTGCCTC  
TTTACATGGTAGCTCAGTTGGTAGGAGCCATCCTCGCAAGTGGGGCGGTG  
TACTTGTGTTCGATCCAAAAGCAGAGCACTTCTACGGAACCTACGCCGGT  
TGGATCAGCCGTGCAGTCCTTCGTCCTCGAGATCATCATATCTTTCCTCC  
TGATGTTTCGTCATCTCTGGCGTGGCCACAGACACCAGAGCTATTGGGGAA  
TTAGCAGGCATTGCTGTGCGATCCACAATTTTGTTGAATGTCCTCGTTGC

CGGGCCGATATCAGGAGCGTCCATGAACCCTGCAAGAAGCATCGGACCCG  
CCATCGTCATGCGTAACTACAAGGCAATCTGGGCCTACGTTTTAGGACCA  
ATGATAGGTACTCTGGCTGGGGGTTTTACTTACAATCTCGTTAGATACAC  
AGACAAGCCGCTCCGAGAGATCACAAAGAGCAGCTCATTCTCAAGAGCG  
TGTCTCGAAATCGTTAG

>MaSIP1-1

ATGGGTGCTATAAGGGCCGCCGCGGCGGACGGGTGATCACGTTCTATG  
GGTCTTCTGCGTCTCTACCGTGCGCGCCGCCACCTCCCTCGTGACGGCCG  
CCCTCCAGATCCAGGGCGTCGCCTTCTCGCTCTTTGTCACCACCACCCTC  
ATCTTCGCCCTCGTCTTTCGTCTTCGGCCTCATCACCGCCGCCATCGGCGG  
CGCCAGCTTTAATCCCACTGCCACGGCCGCGTTCTATGCTGCCGGATTGG  
GGTCCGACAACCTCCTCTCCATGGCGCTCCGCTTCCCCGCCAGGCGGCT  
GGGGCGGTGGCTGGGGCTTTGGCGATCATGGAAGTCATGCCTCCCCAGCA  
CAAGCGCATGTTGGGCGGGCCTTCGTTGAAGGTGGATCTTCACACGGGGG  
CCTTGGCGGAAGGTGTGCTGACCTTCATCATCACCTTGGCCGTGCTCTGG  
ATCATCATCAGGGGCCCTCGCAGCCCGGTCTGTAAGACGTGGATGGTCGC  
CGTCTCCACGGTTGCGATGGTTGTAGCGGGCGCTGGTTAACTGGACCGG  
CCATGAATCCAGCTAATGCATTGGCTGGGCATATATCAACAATCGCCAT  
AATACGTGGGAGCAATTTTACGTCTACTGGATATGCCATTTCATCGGCGC  
TATTGTTGCTGGCTGGTTCTTCAGGATTATCTTCCCGCAGCGTGCAGAGA  
AGGCTAAAAAAGCTTGA

>MaPIP2-8

ATGACGGACGAAGTAAGGGTAGTGACGGAGCACCCACCAGCGCCACTCTT  
CGACGTGGGGGAGCTCAAGCTCTGGTCCCTTCTATCGTGCTCTCATCGCTG  
AGTTCGTTGCCACCCTCCTGTTCTCTATGTCCTCGTGGCTACCGTCATC  
GGCCACAAGGCCGCGTCTCTAGACAACCAGTGCGGCGGGCGTCGGCCTCCT  
TGGGATCGCTTGGGCTGTCGGCGGCATGATCTTTCTTCTCGTCTACTGCA  
CCGCCGGCATCTCTGGTGGACACATCAACCCGGCCGTCACATTTGGTCTT  
CTCCTAGGTCGAAAGGTGTGCGGTGTTGCGGGCGGTGTCGTACATGGTGGC  
GCAGTGTGCGGGCGCCATATGCGGCGTCCGAATCGCGAGGGCTATAATGA  
AACACCAATTCGATGCTTTCGGCGGCGGGACTAACGTGGTGGCCTTATGC  
TACTCCAACGGTGCTGCGCTTGGCGCTGAGATCATCGGCACCTTCGTGCT  
CGTCTACACCGTCTTCACTGCCACCGACCCACGCGCAACGCCCCGTGACT  
CCCACGTTCCGGTGTTGGCGCCTCTATCGATTGGCTTTGCGGTGTTTTTG  
GTGCACTTGGCAACGATTCCGATCACAGGCACAGGTATCAACCCGGCAAG  
GAGCCTCGGAGCTGCTGTCAATTTACAACAGACGGAAGGCATGGAACGATC  
AGTGGATCTTCTGGGTGGGTCCCTTCATCGGAGCTGCGGCCGCCGCGCTG  
TACCACGAGTACGTGTTGAAGTCAGCGGCTATCAAGGCCTTCCGCAGGAG  
CACCGCAACACCTGAAGCATCAGCTCCTCGTCCTCCTCCTCCGTGA



## &gt;MaTIP1-1

ATGCCGTTCTCTCAGATCGCCATTGGACGTCCGGAGGAGGCAACTCACCC  
GAGTGCACCTCAAGGCCGCGCTCGCTGAGTTCATATGCACCCTCATCTTCG  
TCTTCGCCGGCCAAGGCTCCGGCATGGCCTACAACAAGTTGACGAGCGAC  
GGGGCGGCGACGCCCCGCGGACTGATCGCGGCGGCGCTGGCGCACGGCTT  
CGCCTTGTTTCGTGGCGGTGTCGGTGGGGGCTAACATCTCCGGCGGGCACG  
TGAACCCGGCGGTGACCTTCGGAGCGTTCGTGGGCGGGAACATCACGCTG  
CTGCGGGGCATCCTCTACTGGATCGCGCAGCTGCTGGGCTCCACGGTGGC  
CTGCCTCCTGCTCCGCTTCTCCACCGGCGGGCTCGAGACCGGCACCTTCG  
GGCTGTCCGGGGTGAGCGCGTGGGAGGCGCTGGTGCTGGAGATCGTCATG  
ACCTTCGGCCTCGTGTACACCGTCTACGCCACCGCCGTGGACCCCAAGAA  
GGGCAGCCTCGGCACCATCGCCCCATCGCCATCGGCTTCATCGTGGGCG  
CCAACATCCTCGTGGGCGGGCCCTTCAGCGGCGCCTCCATGAACCCCGCC  
GTGTCCTTCGGCCCCGGCCCTCGTCAGCTGGTCCTGGACCCACCAGTGGAT  
CTACTGGCTCGGTCCGCTCATCGGCGGCGGCCTCGCCGGGATCGTCTACG  
AGTTCTTCTTCATCAGCCACTCCCACGAGCAGCTCCCCACCACCGACTAC  
TGA

## &gt;MaPIP1-3

ATGATCTTTGCCTTGGTCTACTGCACCGCCGGCATCTCTGGTGGCCATAT  
CAACCCTGCGGTGACCTTCGGGCTGTTCTGCGGAGGAAGCTCTCCCTCA  
CGAGGGCCATCTTCTACATGGTGATGCAGTGCCTGGGCGCCATCTGCGGC  
GCCGGCGTGGTCAAGGGATTCCAAAAGGGTGTCTACGAGAACAACGGCGG  
CGGAGCCAACGTCGTGGCCGCCGGCTACTCCAAGGGTGACGGCCTGGGCG  
CCGAGATCGTGGGCACCTTCATCCTCGTCTACACCGTCTTCTCTGCAACC  
GATGCCAAGCGTAACGCCAGGGACTCCCATGTCCCCATCCTTGCTCCATT  
GCCCATCGGATTCGCCGTCTTCCTGGTTCACCTGGCGACCATCCCCATCA  
CCGGCACCGGCATCAACCCCGCTCGGAGCCTGGGAGCTGCCATCATCTAC  
AACAAGGACCACGCATGGGATGACCACTGGATCTTCTGGGTCCGTCCGTT  
CATAGGAGCTGCCCTGGCCGCCTTCTACCACCAGATCGTCATCAGAGCCA  
TCCCATTCAGAGCAGATCCTGA

## &gt;MaPIP2-7

ATGTCGAAGGAGGTCAGTGAGGCCGAGCAGGCGCCGGCAAAGGACTACAG  
GGACCCGCCGCCGCGCCGCTTTTGGATTTTCGGCGAGCTCCGTCTCTGGT  
CCTTTTACCGCGCCCTCATAGCTGAGTTCGTGGCCACGCTGCTCTTCCTC  
TACGTACCATCGCCACCGTCATCGGCCACAAGGAGCAGAACGCCGCCGA  
CCAGTGCAGCGGGGTGGCATTCTTGGCATTGCGTGGGCCTTTGGTGGCA  
TGATCTTCATCCTCGTCTACTGCACGGCCGGCATCTCTGGGGGACACATC  
AACCCGGCGGTGACCTTCGGGCTGTTCTGCGGAGGAAGGTGTCGCTGAT  
ACGGGCGCTGCTGTACATAGTGGCGCAGTGCTTGGGAGCCATCGTTGGTG  
TAGGGATCGTGAAGGGCATCATGAAGCACCAGTACAACCTCTCTCGGTGGT

GGAGCCAACGAGGTCGCATCCGGCTACTCCAAGGGCACCGCCCTTGGAGC  
CGAGATCATCGGCACCTTCGTCTCGTCTACACCGTCTTTTCCGCCACCG  
ACCCCAAGCGCAGCGCCCGCGACTCCCACGTTCCCGTGTTGGCACCCTC  
CCCATCGGCTTTGCTGTGTTTCATGGTGCACCTCGCCACCATCCCCATCAC  
CGGTACCGGCATCAACCCCGCTCGGAGCTTAGGTGCTGCAGTGATCTACA  
ACCAGGACAAGCCGTGGGATGATCATTGGATCTTCTGGGTGGGTCCGTTC  
GTAGGAGCGTTGGCCGCGGCGGCGTACCACCAGTACATCCTGAGGGCAGC  
GGCTATCAAGGCCCTGGGATCCTTCCGGAGCAACCCACCAACTGA
